# Supplementary material for: COVID-19 Quarantine Reveals Grade-specific Behavioral Modification of Myopia: One-Million Chinese Schoolchildren Study
Source: bioRxiv or medRxiv preprint supplement (doi:10.1101/2020.11.15.20231936), 2020-11-18
Supplement: Supplementary file [file media-1.pdf]

## **Supplemental Appendix**

## Table of contents

|                                                                                                                                                                         |           |
|-------------------------------------------------------------------------------------------------------------------------------------------------------------------------|-----------|
| <b>Supplementary Figures</b> .....                                                                                                                                      | <b>4</b>  |
| Figure S1. The Adolescent Myopia Information Management System.....                                                                                                     | 4         |
| Figure S2. Correlations between left- and right-eyesight across three examinations .....                                                                                | 4         |
| Figure S3. Population proportion of one-million children students in 11 main districts of Wenzhou .....                                                                 | 5         |
| Figure S4. Grade-specific prevalence of myopia severity among Chinese schoolchildren at the baseline .....                                                              | 6         |
| Figure S5. Grade-specific prevalence of myopia severity among Chinese schoolchildren at the 6-month follow-up.....                                                      | 7         |
| Figure S6. Grade-specific prevalence of myopia severity among Chinese schoolchildren at the 12-month follow-up.....                                                     | 8         |
| Figure S7. The prevalence of myopia and high myopia divided by schoolchildren birth month among all grades at the 6-month follow-up (A) and 12-month follow-up (B)..... | 9         |
| Figure S8. Differences in the prevalence of myopia between schoolchildren birth month of August and September of the same year among three examinations .....           | 10        |
| Figure S9. Differences in the prevalence of high myopia between schoolchildren birth month of August and September of the same year among three examinations .....      | 10        |
| <b>Supplementary Tables</b> .....                                                                                                                                       | <b>11</b> |
| Table S1. Characteristics of school children across three time points used in the current survey ..                                                                     | 11        |
| Table S2. Prevalence of myopia among schoolchildren in East and Southeastern Asia.....                                                                                  | 12        |
| Table S3. Prevalence of myopia and high myopia across every grade in the baseline (Jun-2019) .                                                                          | 13        |
| Table S4. Prevalence of myopia and high myopia across every grade in the 6-month follow-up (Dec-2019) .....                                                             | 13        |

|                                                                                                                    |           |
|--------------------------------------------------------------------------------------------------------------------|-----------|
| Table S5. Prevalence of myopia and high myopia across every grade in the 12-month follow-up (Jun-2020).....        | 13        |
| Table S6. Prevalence of myopia and high myopia among each month.....                                               | 14        |
| Table S7. The influence of COVID-19 on myopia progression among school-aged children.....                          | 21        |
| Table S8. The impact of COVID-19 on myopia progression among school-aged children categorized by grade .....       | 21        |
| Table S9. The impact of COVID-19 on incidence of myopia among school-aged children categorized by grade.....       | 22        |
| Table S10. The impact of COVID-19 on incidence of high myopia among school-aged children categorized by grade..... | 22        |
| <b>References .....</b>                                                                                            | <b>23</b> |

## Supplemental Figures

**Supplemental Figure S1.** The Adolescent Myopia Information Management System.

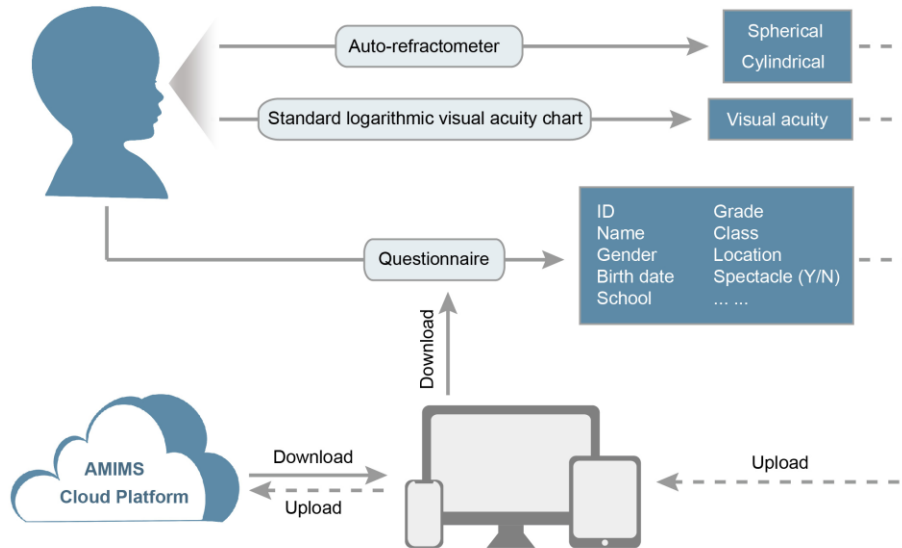

**Supplemental Figure S2. Correlations between left- and right-eyesight across three examinations.**

A) the correlation at the baseline, B) the correlation at the 6-month follow-up, and C) the correlation at the 12-month follow-up. The average correlation coefficient ( $r$ ) across three examinations is 0.954. OD (Oculus Dexter) represents right-eyesight and OS (Oculus Sinister) represents left-eyesight.

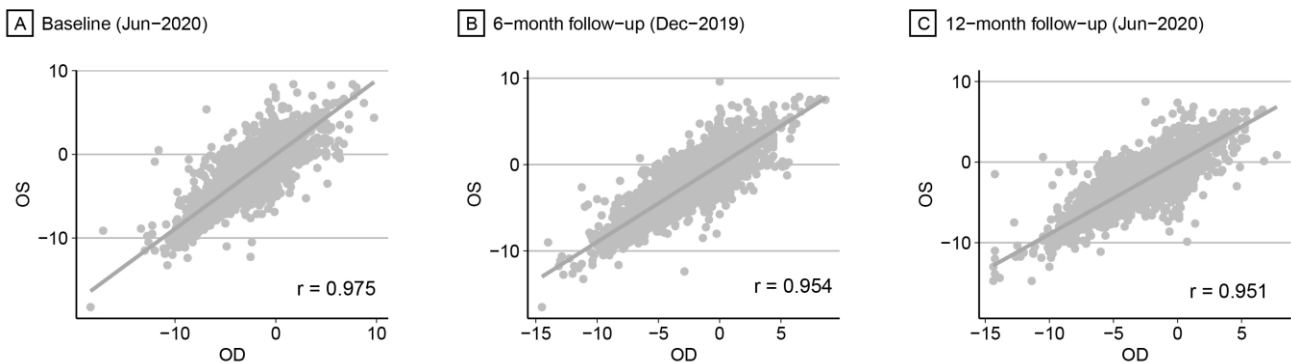

**Supplemental Figure S3. Population proportion of one-million children students in 11 main districts of Wenzhou City.** The color legend indicates the proportion of schoolchildren in each district among all participants among all participants.

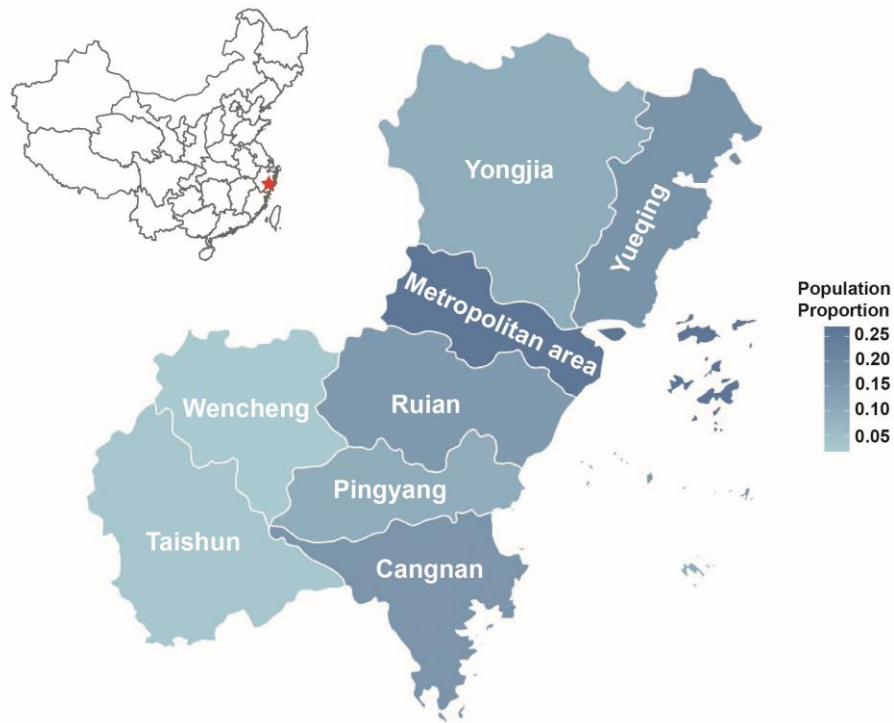

**Supplemental Figure S4. Grade-specific prevalence of myopia severity among Chinese schoolchildren at the baseline.** A) The grade-specific prevalence of overall, non-high, and high myopia among schoolchildren. B)-D) The grade-specific prevalence of overall, non-high, and high myopia among schoolchildren sub-grouped by gender (male/female, B), habitation (Urban/rural, C) and educational system (key/non-key, D) Error bars indicate 95% confidence intervals.

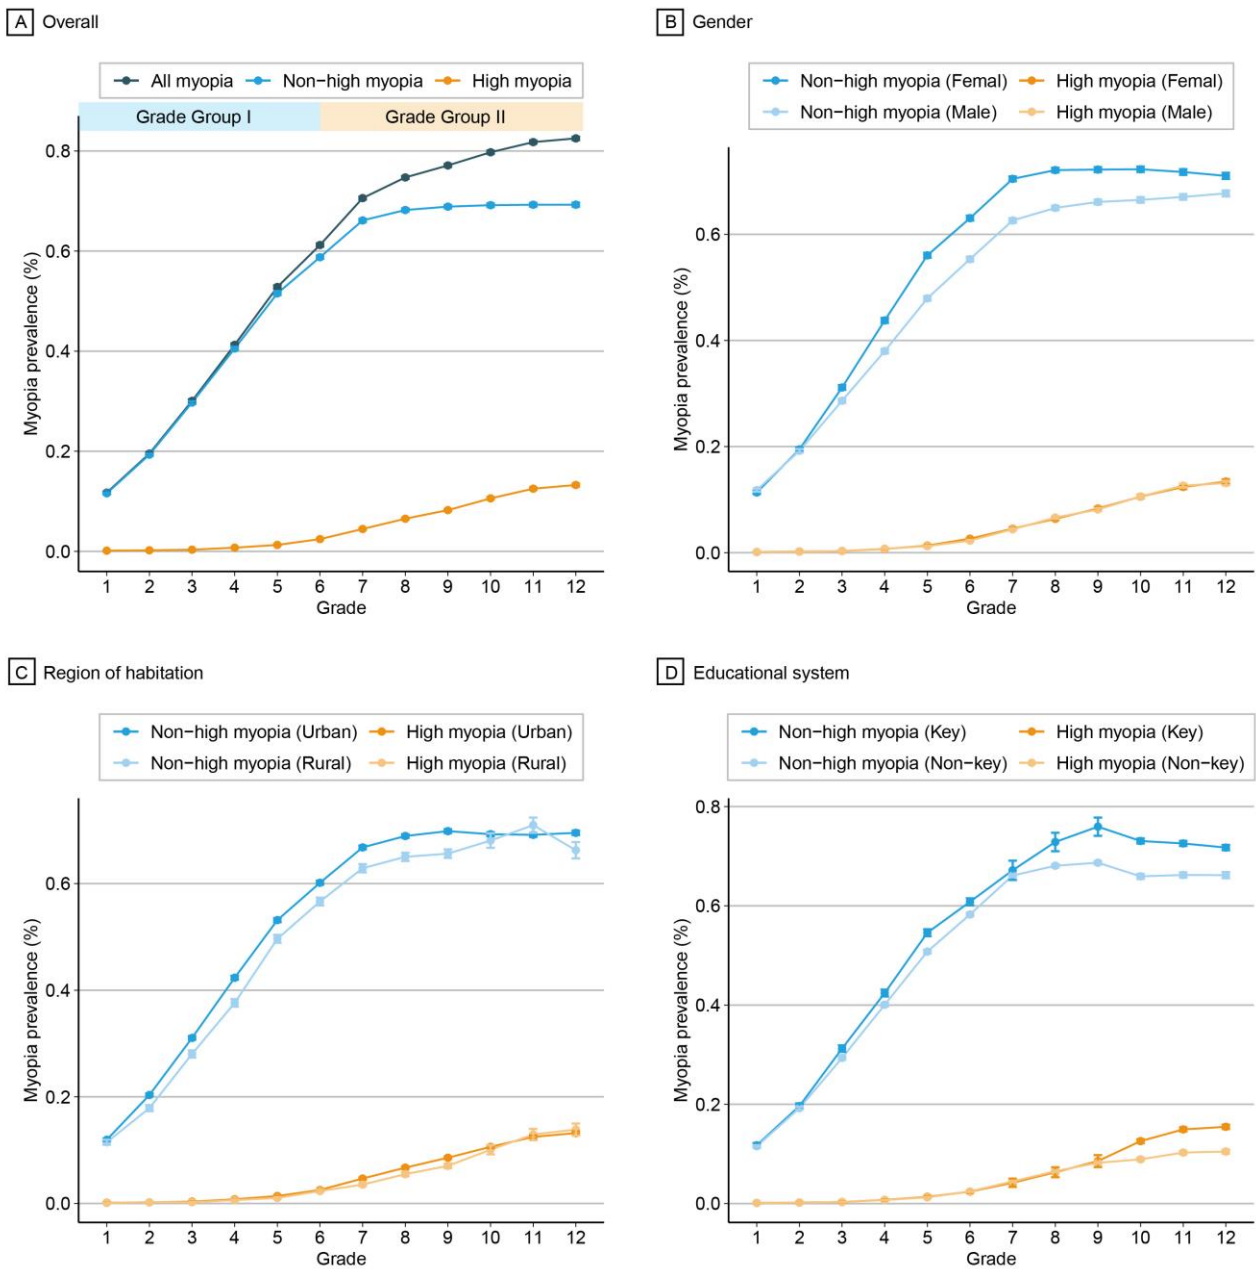

**Supplemental Figure S5. Grade-specific prevalence of myopia severity among Chinese schoolchildren at the 6-month follow-up.** A) The grade-specific prevalence of overall, non-high, and high myopia among schoolchildren. B)-D) The grade-specific prevalence of overall, non-high, and high myopia among schoolchildren sub-grouped by gender (male/female, B), habitation (Urban/rural, C) and educational system (key/non-key, D). Error bars indicate 95% confidence intervals.

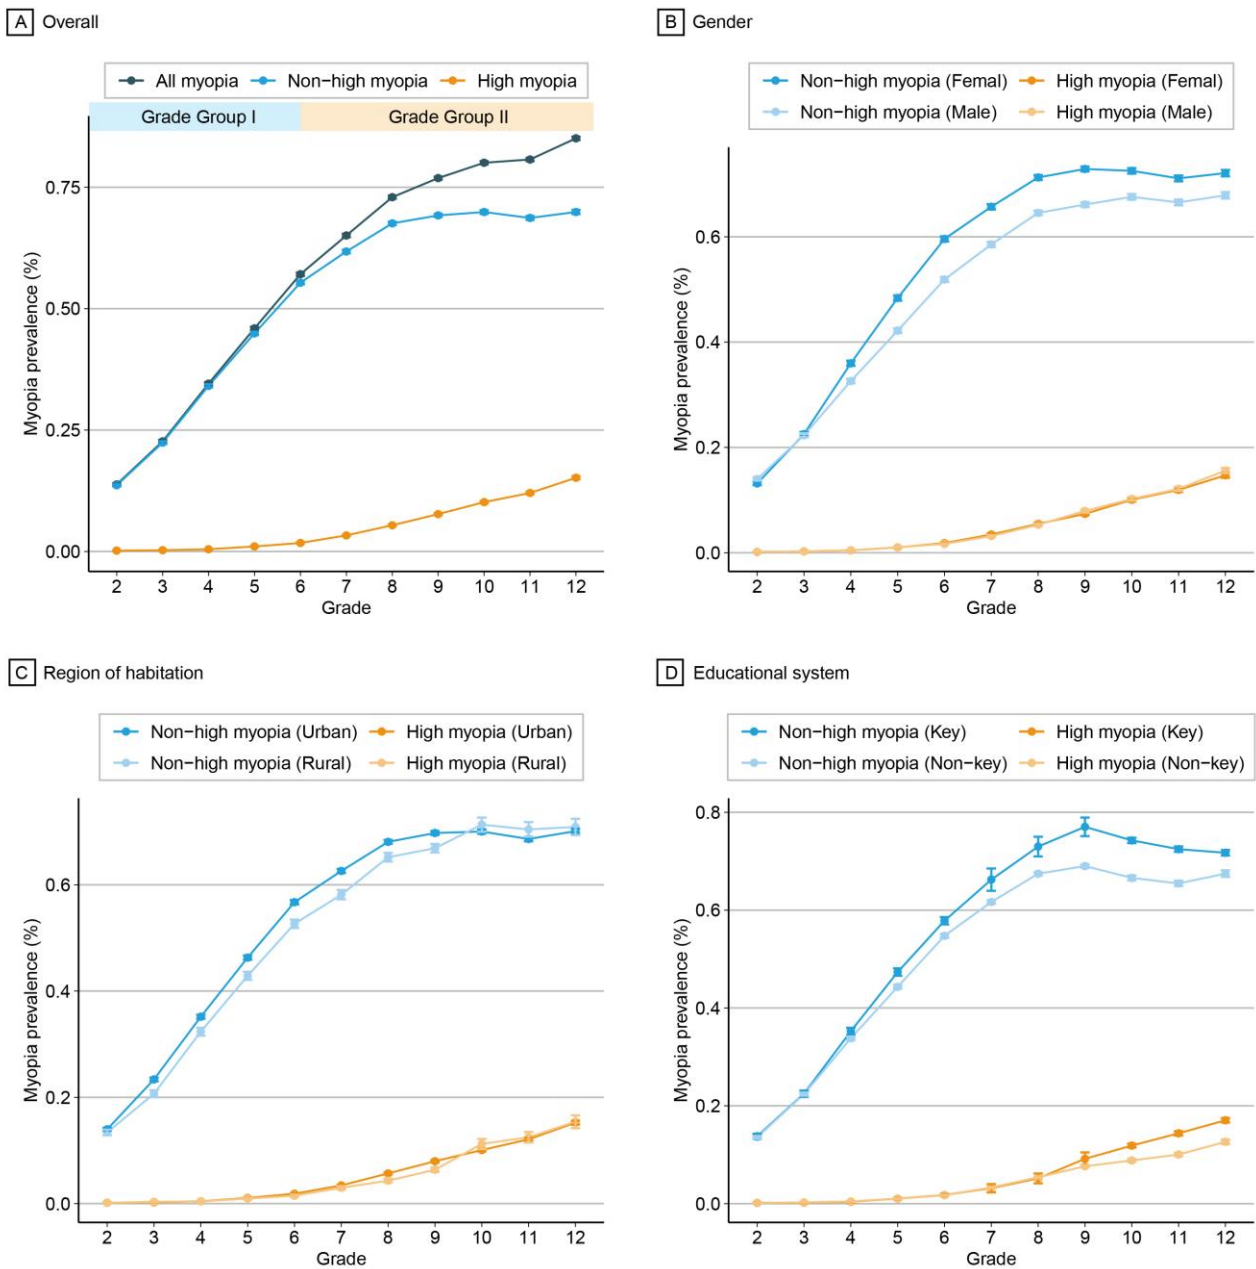

**Supplemental Figure S6. Grade-specific prevalence of myopia severity among Chinese schoolchildren at the 12-month follow-up.** A) The grade-specific prevalence of overall, non-high, and high myopia among schoolchildren. B)-D) The grade-specific prevalence of overall, non-high, and high myopia among schoolchildren sub-grouped by gender (male/female, B), habitation (Urban/rural, C) and educational system (key/non-key, D). Error bars indicate 95% confidence intervals.

**A** Overall

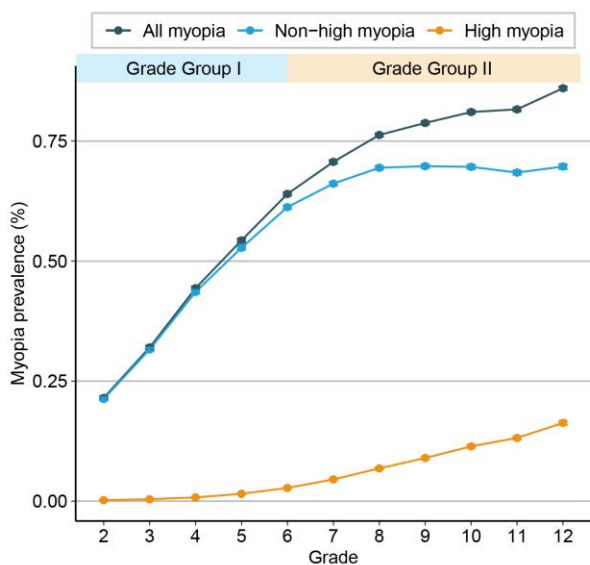

**B** Gender

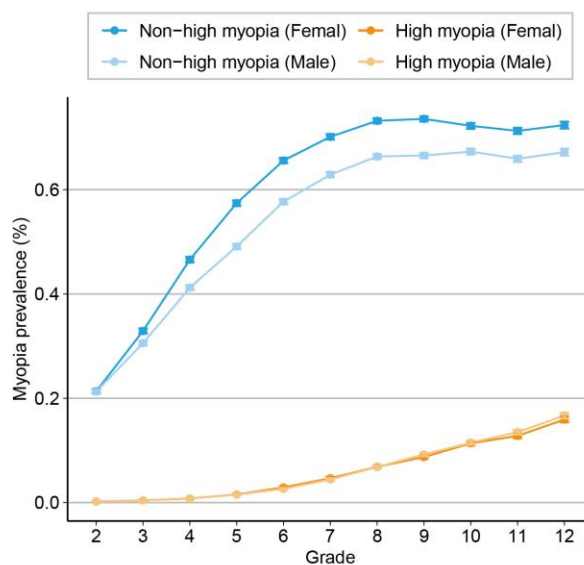

**C** Region of habitation

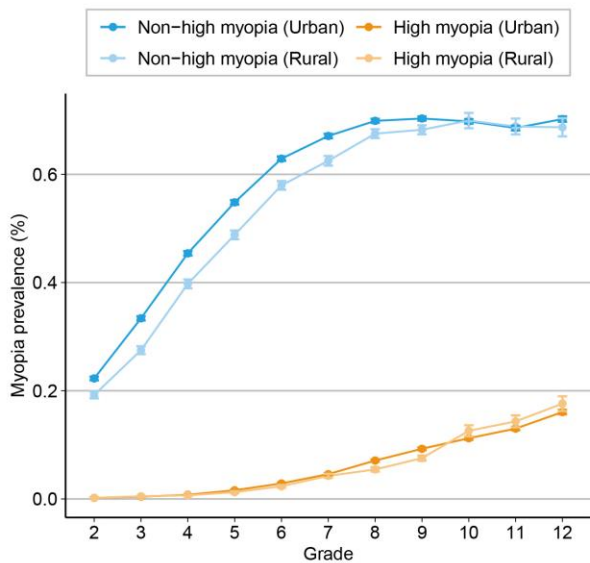

**D** Educational system

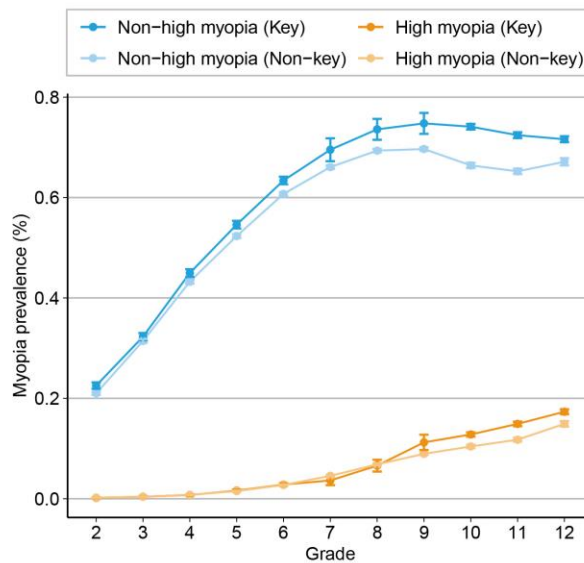



**Supplemental Figure S7. The prevalence of myopia and high myopia divided by schoolchildren birth month among all grades at the 6-month follow-up (A) and 12-month follow-up (B). Each grade was divided into 12 bars according to schoolchildren birth months, ranging from September to August of next year according to Chinese enrollment policy.**

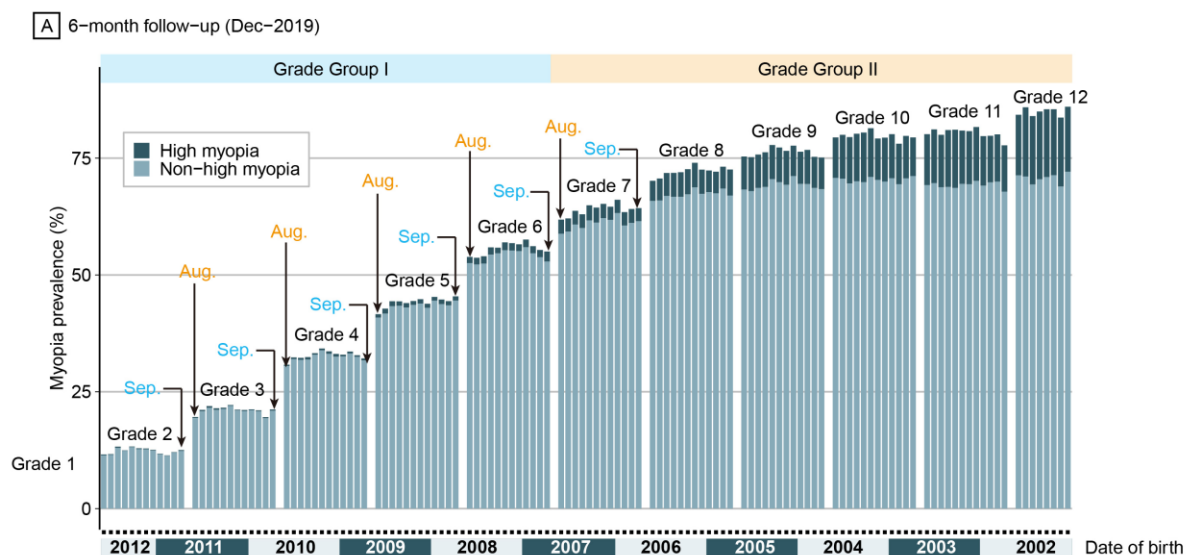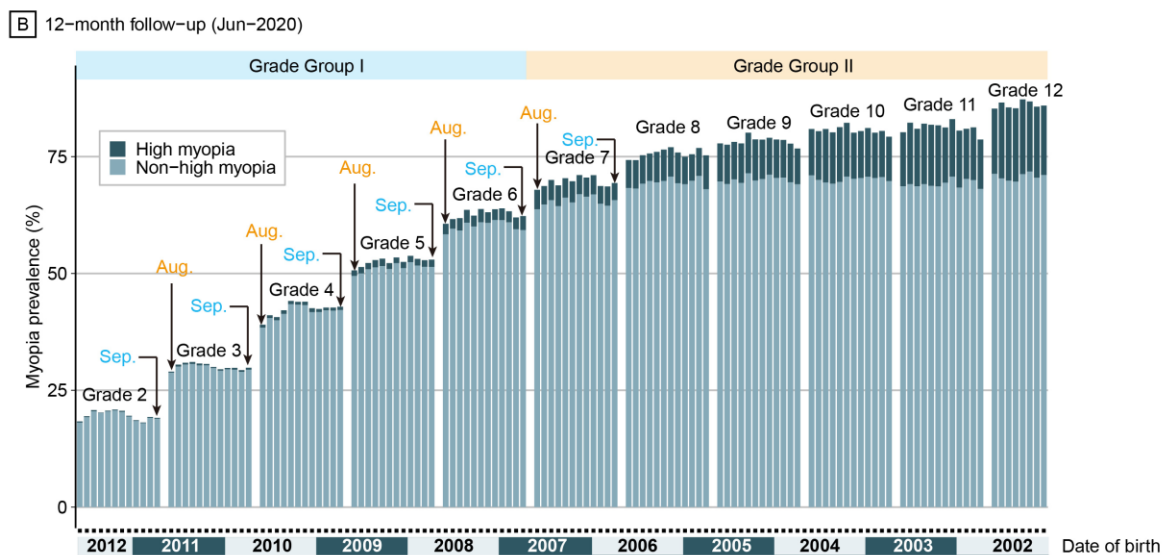

**Supplemental Figure S8. Differences in the prevalence of myopia between schoolchildren birth month of August and September of the same year among three examinations. A) Baseline (June 2019), B) 6-month follow-up (December 2019), C) 12-month follow-up (June 2020).**

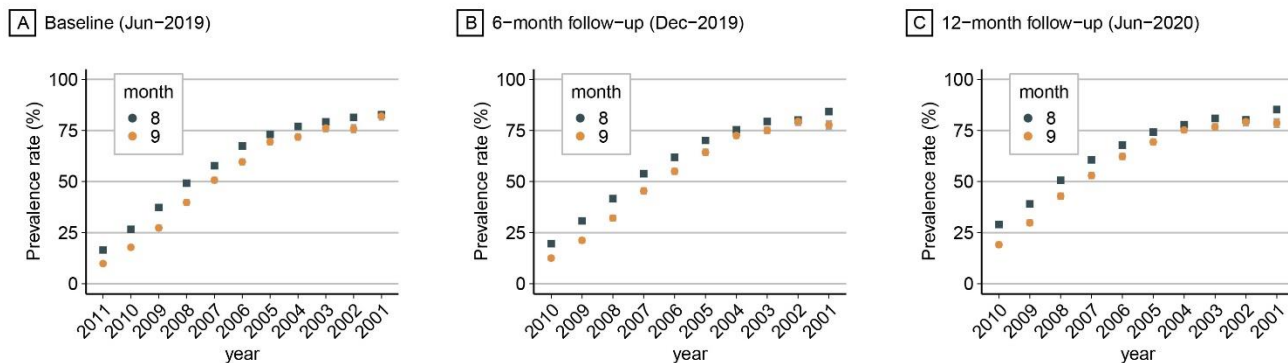

**Supplemental Figure S9. Differences in the prevalence of high myopia between schoolchildren birth month of August and September of the same year among three examinations. A) Baseline (June 2019), B) 6-month follow-up (December 2019), C) 12-month follow-up (June 2020).**

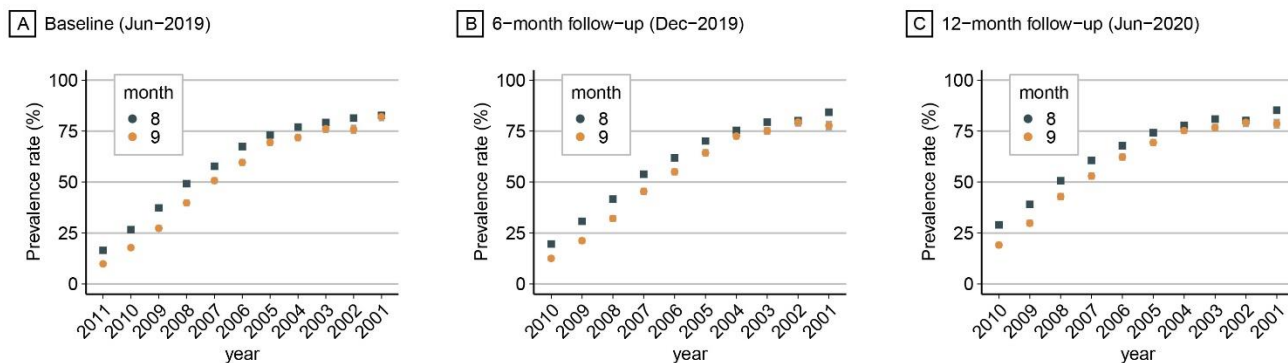

## Supplemental Tables

**Supplemental Table S1. Characteristics of school children across three time points used in the current survey**

| Characteristics           | Baseline<br>(Jun-2019) |            | 6-month follow-up (Dec-<br>2019) |            | 12-month follow-up (Jun-<br>2020) |            |
|---------------------------|------------------------|------------|----------------------------------|------------|-----------------------------------|------------|
|                           | Number of<br>Samples   | Proportion | Number of<br>Samples             | Proportion | Number of<br>Samples              | Proportion |
| <b>Total</b>              | 1,007,149              | 100%       | 813,755                          | 100%       | 768,492                           | 100%       |
| <b>Gender</b>             |                        |            |                                  |            |                                   |            |
| Male                      | 550,756                | 54.98%     | 445,610                          | 54.76%     | 419,916                           | 54.64%     |
| Female                    | 450,993                | 45.02%     | 368,145                          | 45.24%     | 348,576                           | 45.36%     |
| <b>Age (years)</b>        |                        |            |                                  |            |                                   |            |
| ≤7                        | 67,219                 | 6.71%      | 58,525                           | 7.19%      | NA                                | NA         |
| 8                         | 99,819                 | 9.96%      | 87,486                           | 10.75%     | 55,587                            | 7.23%      |
| 9                         | 94,737                 | 9.46%      | 83,362                           | 10.24%     | 83,288                            | 10.84%     |
| 10                        | 95,240                 | 9.51%      | 83,922                           | 10.31%     | 79,526                            | 10.35%     |
| 11                        | 95,524                 | 9.54%      | 84,144                           | 10.34%     | 80,011                            | 10.41%     |
| 12                        | 93,111                 | 9.29%      | 78,419                           | 9.64%      | 80,157                            | 10.43%     |
| 13                        | 89,565                 | 8.94%      | 77,937                           | 9.58%      | 74,841                            | 9.74%      |
| 14                        | 87,010                 | 8.69%      | 77,101                           | 9.47%      | 74,143                            | 9.65%      |
| 15                        | 84,618                 | 8.45%      | 67,881                           | 8.34%      | 71,785                            | 9.34%      |
| 16                        | 65,155                 | 6.50%      | 53,890                           | 6.62%      | 63,506                            | 8.26%      |
| 17                        | 61,292                 | 6.12%      | 47,231                           | 5.80%      | 50,578                            | 6.58%      |
| ≥18                       | 68,459                 | 6.83%      | 13,859                           | 1.70%      | 55,073                            | 7.17%      |
| <b>Educational level</b>  |                        |            |                                  |            |                                   |            |
| Elementary school         | 580,177                | 57.92%     | 429,657                          | 52.80%     | 409,143                           | 53.24%     |
| Junior high school        | 250,839                | 25.04%     | 229,302                          | 28.18%     | 215,892                           | 28.09%     |
| Senior high school        | 170,733                | 17.04%     | 154,796                          | 19.02%     | 143,457                           | 18.67%     |
| <b>Educational system</b> |                        |            |                                  |            |                                   |            |
| Non-Key school            | 796,161                | 79.48%     | 651,393                          | 80.05%     | 616,576                           | 80.23%     |
| Key school                | 205,588                | 20.52%     | 162,362                          | 19.95%     | 151,916                           | 19.77%     |
| <b>District of origin</b> |                        |            |                                  |            |                                   |            |
| Yueqing                   | 170,014                | 16.97%     | 130,215                          | 16.00%     | 125,472                           | 16.33%     |
| Pingyang                  | 96,852                 | 9.67%      | 83,793                           | 10.30%     | 77,991                            | 10.15%     |
| Wencheng                  | 24,201                 | 2.42%      | 20,675                           | 2.54%      | 19,501                            | 2.54%      |
| Yongjia                   | 98,138                 | 9.80%      | 78,615                           | 9.66%      | 74,860                            | 9.74%      |
| Taishun                   | 32,306                 | 3.22%      | 26,901                           | 3.31%      | 25,338                            | 3.30%      |
| Dongtou                   | 13,919                 | 1.40%      | 11,781                           | 1.45%      | 11,532                            | 1.50%      |
| Ruian                     | 150,404                | 15.01%     | 123,515                          | 15.18%     | 117,482                           | 15.29%     |

|                             |         |        |         |        |         |        |
|-----------------------------|---------|--------|---------|--------|---------|--------|
| Ouhai                       | 80,892  | 8.08%  | 68,609  | 8.43%  | 64,271  | 8.36%  |
| Cangnan                     | 164,972 | 16.47% | 126,173 | 15.51% | 82,793  | 10.77% |
| Lucheng                     | 98,829  | 9.87%  | 81,300  | 9.99%  | 77,086  | 10.03% |
| Longwan                     | 71,222  | 7.11%  | 62,178  | 7.64%  | 92,166  | 12.00% |
| <b>Region of habitation</b> |         |        |         |        |         |        |
| Rural                       | 160,170 | 15.99% | 128,437 | 15.78% | 119,324 | 15.53% |
| Urban                       | 777,102 | 77.57% | 622,398 | 76.48% | 556,778 | 72.45% |
| Ambiguity                   | 64,477  | 6.44%  | 62,920  | 7.73%  | 92,390  | 12.02% |

**Supplemental Table S2. Prevalence of myopia among schoolchildren in East and Southeastern Asia**

| Locality     | Year | Age   | Participants | Prevalence (%) | Cut-off (D)  | Reference |
|--------------|------|-------|--------------|----------------|--------------|-----------|
| Beijing      | 2014 | 7-18  | 15,066       | 9.7-74.2       | $\geq -0.5$  | 1, 2      |
| Beijing      | 2014 | 16-18 | 4,677        | 80.7           | $\geq -1.00$ | 3         |
| ShunYi       | 1998 | 5-15  | 5,884        | 45.9           | $\geq -0.5$  | 4         |
| Chaoyang     | 2011 | 5-14  | 4,249        | 7.4-67.5       | $\geq -0.5$  | 5         |
| Tianjin      | 2019 | 6-15  | 482          | 71.2           | $\geq -0.5$  | 6         |
| Guangzhou    | 2005 | 13-17 | 2,454        | 36.8-53.9      | $\geq -0.5$  | 7         |
| Guangzhou    | 2003 | 7-15  | 4,364        | 7.7-78.4       | $\geq -0.5$  | 8         |
| Ejina        | 2014 | 6-21  | 1,565        | 10-71.3        | $\geq -0.5$  | 9         |
| Shandong     | 2010 | 4-17  | 6,026        | 1.7-84.6       | $\geq -0.5$  | 10        |
| Heilongjiang | 2009 | 5-18  | 1,675        | 0.9-8.2        | $\geq -0.5$  | 11        |
| Yongchuan    | 2007 | 6-15  | 3,070        | 0.42-27.11     | $\geq -0.5$  | 12        |
| Neimenggu    | 2003 | 7-17  | 1,057        | 5.8            | $\geq -0.5$  | 13        |
| Xichang      | 2007 | 11-17 | 1,892        | 62.3           | $\geq -0.5$  | 14        |
| HongKong     | 2000 | 6-15  | 7,560        | 17-53.1        | $\geq -0.5$  | 15        |
| HongKong     | 2010 | 6-12  | 2,651        | 18.3-61.5      | $\geq -0.5$  | 16        |
| HongKong     | 2001 | 13-15 | 1,191        | 62-87.2        | $\geq -0.5$  | 17        |
| Taiwan       | 2000 | 7-18  | 10,889       | 20-84          | $\geq -0.25$ | 18        |
| Taiwan       | 2000 | 7-18  | 45,345       | 5.8-84         | $\geq -0.25$ | 19        |
| Taiwan       | 2005 | 3-6   | 618          | 3.0-12.2       | $\geq -0.5$  | 20        |
| Taiwan       | 2005 | 12-19 | 20,609       | 70.3           | $\geq -0.5$  | 21        |
| Korea        | 2011 | 19    | 2,805        | 83.3           | $\geq -0.5$  | 22        |
| Korea        | 2012 | 5-19  | 7,486        | 20.4-80.2      | $\geq -0.75$ | 23        |
| Korea        | 2005 | 1-18  | 8,633        | 1.1-45.7       | $\geq -0.5$  | 24        |
| Seoul        | 2010 | 19    | 23,616       | 96.5           | $\geq -0.5$  | 25        |
| Singapore    | 2002 | 15-19 | 946          | 73.9           | $\geq -0.5$  | 26        |
| Singapore    | 2001 | 7-9   | 1,453        | 29-53.1        | $\geq -0.5$  | 27        |
| Singapore    | 2008 | 6-7   | 628          | 29.1           | $\geq -0.5$  | 28        |

|       |      |      |        |           |        |    |
|-------|------|------|--------|-----------|--------|----|
| Japan | 1996 | 3-17 | 17,320 | 37.6-46.2 | ≥ -0.5 | 29 |
| Tokyo | 2017 | 6-14 | 1,416  | 63.1-94.2 | ≥ -0.5 | 30 |

**Supplemental Table S3. Prevalence of myopia and high myopia across every grade in the baseline (Jun-2019)**

| Grade group           | Educational level  | Grade | Count  | Prevalence (95% CI)    |                        |
|-----------------------|--------------------|-------|--------|------------------------|------------------------|
|                       |                    |       |        | Myopia                 | High myopia            |
| <b>Grade Group I</b>  | Elementary school  | 1     | 104669 | 11.73% (11.53%-11.92%) | 0.13% (0.11%-0.16%)    |
|                       |                    | 2     | 98389  | 19.52% (19.28%-19.77%) | 0.2% (0.17%-0.23%)     |
|                       |                    | 3     | 95543  | 30.06% (29.77%-30.35%) | 0.33% (0.29%-0.36%)    |
|                       |                    | 4     | 96215  | 41.26% (40.95%-41.57%) | 0.73% (0.67%-0.78%)    |
|                       |                    | 5     | 94442  | 52.82% (52.51%-53.14%) | 1.28% (1.21%-1.35%)    |
|                       |                    | 6     | 90919  | 61.21% (60.89%-61.53%) | 2.44% (2.34%-2.54%)    |
| <b>Grade Group II</b> | Junior high school | 7     | 87742  | 70.59% (70.29%-70.89%) | 4.46% (4.32%-4.6%)     |
|                       |                    | 8     | 86103  | 74.72% (74.42%-75.01%) | 6.51% (6.35%-6.68%)    |
|                       |                    | 9     | 76994  | 77.12% (76.82%-77.41%) | 8.23% (8.04%-8.42%)    |
|                       |                    | 10    | 61688  | 79.75% (79.43%-80.07%) | 10.58% (10.33%-10.82%) |
|                       |                    | 11    | 59806  | 81.78% (81.47%-82.09%) | 12.52% (12.25%-12.78%) |
|                       |                    | 12    | 49239  | 82.52% (82.19%-82.86%) | 13.25% (12.95%-13.55%) |

**Supplemental Table S4. Prevalence of myopia and high myopia across every grade in the 6-month follow-up (Dec-2019)**

| Grade group          | Educational level | Grade                 | Count              | Prevalence (95% CI)    |                        |
|----------------------|-------------------|-----------------------|--------------------|------------------------|------------------------|
|                      |                   |                       |                    | Myopia                 | High myopia            |
| <b>Grade Group I</b> | Elementary school | 2                     | 91049              | 13.79% (13.57%-14.02%) | 0.17% (0.14%-0.19%)    |
|                      |                   | 3                     | 86238              | 22.66% (22.38%-22.94%) | 0.26% (0.22%-0.29%)    |
|                      |                   | 4                     | 84212              | 34.55% (34.23%-34.87%) | 0.45% (0.41%-0.5%)     |
|                      |                   | 5                     | 84851              | 45.93% (45.6%-46.27%)  | 1.02% (0.96%-1.09%)    |
|                      |                   | 6                     | 83307              | 57.09% (56.76%-57.43%) | 1.75% (1.66%-1.84%)    |
|                      |                   | <b>Grade Group II</b> | Junior high school | 7                      | 74088                  |
| 8                    | 79188             |                       |                    | 72.96% (72.65%-73.27%) | 5.39% (5.23%-5.55%)    |
| 9                    | 76026             |                       |                    | 76.89% (76.59%-77.19%) | 7.68% (7.49%-7.87%)    |
| 10                   | 57341             |                       |                    | 80.05% (79.72%-80.38%) | 10.15% (9.9%-10.4%)    |
| 11                   | 54377             |                       |                    | 80.72% (80.39%-81.05%) | 12.04% (11.77%-12.32%) |
| 12                   | 43078             |                       |                    | 85.08% (84.74%-85.41%) | 15.17% (14.83%-15.51%) |

**Supplemental Table S5. Prevalence of myopia and high myopia across every grade in the 12-month follow-up (Jun-2020)**

| Grade group          | Educational level | Grade | Count | Prevalence (95% CI)    |                     |
|----------------------|-------------------|-------|-------|------------------------|---------------------|
|                      |                   |       |       | Myopia                 | High myopia         |
| <b>Grade Group I</b> | Elementary school | 2     | 86491 | 21.51% (21.24%-21.78%) | 0.21% (0.18%-0.24%) |
|                      |                   | 3     | 82136 | 32.01% (31.69%-32.33%) | 0.41% (0.36%-0.45%) |
|                      |                   | 4     | 80378 | 44.35% (44.01%-44.7%)  | 0.78% (0.72%-0.84%) |
|                      |                   | 5     | 80766 | 54.31% (53.97%-54.66%) | 1.54% (1.45%-1.62%) |

|                       |                    |       |                        |                        |                        |
|-----------------------|--------------------|-------|------------------------|------------------------|------------------------|
| <b>Grade Group II</b> | Junior high school | 6     | 79372                  | 64% (63.66%-64.33%)    | 2.75% (2.64%-2.87%)    |
|                       |                    | 7     | 70855                  | 70.67% (70.34%-71.01%) | 4.54% (4.38%-4.69%)    |
|                       |                    | 8     | 75118                  | 76.28% (75.97%-76.58%) | 6.83% (6.65%-7.01%)    |
|                       | 9                  | 69919 | 78.78% (78.47%-79.08%) | 8.99% (8.78%-9.21%)    |                        |
|                       | Senior high school | 10    | 54161                  | 81.05% (80.72%-81.38%) | 11.42% (11.15%-11.69%) |
|                       |                    | 11    | 51130                  | 81.62% (81.28%-81.95%) | 13.17% (12.88%-13.46%) |
|                       |                    | 12    | 38166                  | 86.01% (85.66%-86.36%) | 16.31% (15.93%-16.68%) |

**Supplemental Table S6. Prevalence of myopia and high myopia among each month**

| Grade | Birth |    | Prevalence (95% CI)    |                     |                              |                     |                               |                     |
|-------|-------|----|------------------------|---------------------|------------------------------|---------------------|-------------------------------|---------------------|
|       |       |    | Baseline (Jun-2019)    |                     | 6-month follow-up (Dec-2019) |                     | 12-month follow-up (Jun-2020) |                     |
|       |       |    | Myopia                 | High myopia         | Myopia                       | High myopia         | Myopia                        | High myopia         |
| 1     | 2012  | 8  | 9.53% (8.91%-10.15%)   | 0.2% (0.1%-0.29%)   | NA                           | NA                  | NA                            | NA                  |
| 1     | 2012  | 7  | 9.75% (9.11%-10.38%)   | 0.12% (0.05%-0.19%) | NA                           | NA                  | NA                            | NA                  |
| 1     | 2012  | 6  | 11.01% (10.33%-11.69%) | 0.19% (0.1%-0.29%)  | NA                           | NA                  | NA                            | NA                  |
| 1     | 2012  | 5  | 10.4% (9.73%-11.08%)   | 0.09% (0.02%-0.15%) | NA                           | NA                  | NA                            | NA                  |
| 1     | 2012  | 4  | 11.25% (10.55%-11.96%) | 0.16% (0.07%-0.24%) | NA                           | NA                  | NA                            | NA                  |
| 1     | 2012  | 3  | 10.2% (9.56%-10.84%)   | 0.15% (0.07%-0.23%) | NA                           | NA                  | NA                            | NA                  |
| 1     | 2012  | 2  | 10.65% (9.98%-11.31%)  | 0.1% (0.03%-0.16%)  | NA                           | NA                  | NA                            | NA                  |
| 1     | 2012  | 1  | 10.01% (9.4%-10.62%)   | 0.1% (0.03%-0.16%)  | NA                           | NA                  | NA                            | NA                  |
| 1     | 2011  | 12 | 9.57% (8.97%-10.17%)   | 0.08% (0.02%-0.13%) | NA                           | NA                  | NA                            | NA                  |
| 1     | 2011  | 11 | 8.78% (8.2%-9.36%)     | 0.11% (0.04%-0.17%) | NA                           | NA                  | NA                            | NA                  |
| 1     | 2011  | 10 | 9.37% (8.76%-9.97%)    | 0.12% (0.05%-0.2%)  | NA                           | NA                  | NA                            | NA                  |
| 1     | 2011  | 9  | 9.85% (9.19%-10.51%)   | 0.13% (0.05%-0.21%) | NA                           | NA                  | NA                            | NA                  |
| 2     | 2011  | 8  | 16.5% (15.71%-17.3%)   | 0.24% (0.13%-0.35%) | 11.58% (10.86%-12.31%)       | 0.2% (0.1%-0.3%)    | 18.34% (17.43%-19.24%)        | 0.26% (0.14%-0.37%) |
| 2     | 2011  | 7  | 18.12% (17.27%-18.97%) | 0.21% (0.11%-0.32%) | 11.66% (10.93%-12.4%)        | 0.15% (0.06%-0.24%) | 19.44% (18.51%-20.36%)        | 0.21% (0.11%-0.32%) |
| 2     | 2011  | 6  | 18.45% (17.57%-        | 0.2% (0.1%-         | 13.25% (12.47%-              | 0.26% (0.15%-       | 20.76% (19.8%-                | 0.26% (0.14%-       |

|   |      |    |                            |                         |                            |                         |                            |                         |
|---|------|----|----------------------------|-------------------------|----------------------------|-------------------------|----------------------------|-------------------------|
|   |      |    | 19.33%)                    | 0.3%)                   | 14.04%)                    | 0.38%)                  | 21.72%)                    | 0.38%)                  |
| 2 | 2011 | 5  | 18.26% (17.38%-<br>19.15%) | 0.22% (0.11%-<br>0.33%) | 12.47% (11.69%-<br>13.25%) | 0.1% (0.03%-<br>0.18%)  | 20.22% (19.25%-<br>21.2%)  | 0.12% (0.04%-<br>0.21%) |
| 2 | 2011 | 4  | 17.82% (16.94%-<br>18.69%) | 0.22% (0.11%-<br>0.32%) | 13.28% (12.47%-<br>14.09%) | 0.15% (0.06%-<br>0.24%) | 20.64% (19.65%-<br>21.63%) | 0.19% (0.08%-<br>0.29%) |
| 2 | 2011 | 3  | 18.21% (17.37%-<br>19.06%) | 0.11% (0.04%-<br>0.19%) | 12.91% (12.15%-<br>13.66%) | 0.18% (0.09%-<br>0.28%) | 20.87% (19.93%-<br>21.81%) | 0.18% (0.08%-<br>0.28%) |
| 2 | 2011 | 2  | 17.92% (17.06%-<br>18.78%) | 0.18% (0.09%-<br>0.28%) | 12.85% (12.08%-<br>13.62%) | 0.17% (0.07%-<br>0.26%) | 20.62% (19.66%-<br>21.57%) | 0.26% (0.14%-<br>0.38%) |
| 2 | 2011 | 1  | 17.61% (16.79%-<br>18.42%) | 0.18% (0.09%-<br>0.27%) | 12.55% (11.83%-<br>13.28%) | 0.14% (0.06%-<br>0.22%) | 19.55% (18.67%-<br>20.44%) | 0.16% (0.07%-<br>0.25%) |
| 2 | 2010 | 12 | 17.69% (16.88%-<br>18.5%)  | 0.13% (0.05%-<br>0.2%)  | 11.75% (11.05%-<br>12.45%) | 0.11% (0.04%-<br>0.18%) | 18.59% (17.72%-<br>19.46%) | 0.18% (0.09%-<br>0.28%) |
| 2 | 2010 | 11 | 17.5% (16.71%-<br>18.3%)   | 0.22% (0.12%-<br>0.31%) | 11.37% (10.67%-<br>12.06%) | 0.09% (0.02%-<br>0.15%) | 18.1% (17.24%-<br>18.96%)  | 0.16% (0.07%-<br>0.24%) |
| 2 | 2010 | 10 | 16.47% (15.68%-<br>17.26%) | 0.15% (0.07%-<br>0.24%) | 12.08% (11.36%-<br>12.8%)  | 0.1% (0.03%-<br>0.17%)  | 19.28% (18.38%-<br>20.17%) | 0.17% (0.08%-<br>0.27%) |
| 2 | 2010 | 9  | 17.81% (16.95%-<br>18.68%) | 0.27% (0.15%-<br>0.38%) | 12.53% (11.74%-<br>13.31%) | 0.18% (0.08%-<br>0.27%) | 19.09% (18.13%-<br>20.05%) | 0.2% (0.09%-<br>0.31%)  |
| 3 | 2010 | 8  | 26.64% (25.65%-<br>27.64%) | 0.21% (0.11%-<br>0.31%) | 19.58% (18.68%-<br>20.49%) | 0.22% (0.11%-<br>0.32%) | 28.99% (27.93%-<br>30.06%) | 0.26% (0.14%-<br>0.38%) |
| 3 | 2010 | 7  | 27.62% (26.59%-<br>28.64%) | 0.26% (0.14%-<br>0.37%) | 21.11% (20.15%-<br>22.07%) | 0.26% (0.14%-<br>0.38%) | 30.5% (29.39%-<br>31.61%)  | 0.42% (0.27%-<br>0.58%) |
| 3 | 2010 | 6  | 28.26% (27.22%-<br>29.31%) | 0.28% (0.16%-<br>0.41%) | 21.92% (20.92%-<br>22.93%) | 0.35% (0.21%-<br>0.49%) | 30.9% (29.75%-<br>32.04%)  | 0.41% (0.26%-<br>0.57%) |
| 3 | 2010 | 5  | 28.95% (27.88%-<br>30.03%) | 0.38% (0.23%-<br>0.53%) | 21.46% (20.45%-<br>22.46%) | 0.33% (0.19%-<br>0.47%) | 31.05% (29.9%-<br>32.21%)  | 0.41% (0.25%-<br>0.57%) |
| 3 | 2010 | 4  | 29.16% (28.08%-<br>30.24%) | 0.29% (0.16%-<br>0.42%) | 21.58% (20.58%-<br>22.58%) | 0.26% (0.14%-<br>0.39%) | 30.73% (29.59%-<br>31.88%) | 0.4% (0.25%-<br>0.56%)  |
| 3 | 2010 | 3  | 28.92% (27.89%-<br>29.94%) | 0.21% (0.11%-<br>0.32%) | 22.17% (21.2%-<br>23.14%)  | 0.16% (0.06%-<br>0.25%) | 30.63% (29.53%-<br>31.73%) | 0.28% (0.16%-<br>0.41%) |
| 3 | 2010 | 2  | 29.15% (28.12%-<br>30.18%) | 0.41% (0.27%-<br>0.56%) | 21.16% (20.19%-<br>22.12%) | 0.15% (0.06%-<br>0.24%) | 29.98% (28.86%-<br>31.09%) | 0.26% (0.14%-<br>0.38%) |
| 3 | 2010 | 1  | 27.9% (26.93%-<br>28.87%)  | 0.4% (0.26%-<br>0.54%)  | 21.09% (20.16%-<br>22.02%) | 0.2% (0.1%-<br>0.3%)    | 29.51% (28.44%-<br>30.57%) | 0.33% (0.19%-<br>0.46%) |
| 3 | 2009 | 12 | 28.49% (27.55%-<br>29.44%) | 0.31% (0.19%-<br>0.43%) | 21.23% (20.3%-<br>22.15%)  | 0.16% (0.07%-<br>0.25%) | 29.78% (28.72%-<br>30.84%) | 0.31% (0.18%-<br>0.44%) |
| 3 | 2009 | 11 | 28.33% (27.37%-<br>29.28%) | 0.32% (0.2%-<br>0.43%)  | 21.02% (20.12%-<br>21.93%) | 0.21% (0.11%-<br>0.31%) | 29.81% (28.77%-<br>30.85%) | 0.43% (0.28%-<br>0.58%) |
| 3 | 2009 | 10 | 27.26% (26.34%-<br>28.19%) | 0.16% (0.08%-<br>0.24%) | 19.57% (18.67%-<br>20.47%) | 0.24% (0.13%-<br>0.35%) | 29.31% (28.25%-<br>30.37%) | 0.38% (0.24%-<br>0.52%) |
| 3 | 2009 | 9  | 27.33% (26.31%-<br>28.35%) | 0.3% (0.17%-<br>0.42%)  | 21.21% (20.22%-<br>22.2%)  | 0.24% (0.13%-<br>0.36%) | 29.82% (28.69%-<br>30.96%) | 0.41% (0.26%-<br>0.57%) |

|   |      |    |                        |                     |                        |                     |                        |                     |
|---|------|----|------------------------|---------------------|------------------------|---------------------|------------------------|---------------------|
| 4 | 2009 | 8  | 37.28% (36.18%-38.37%) | 0.5% (0.34%-0.66%)  | 30.79% (29.68%-31.89%) | 0.3% (0.17%-0.43%)  | 39.03% (37.84%-40.22%) | 0.62% (0.43%-0.81%) |
| 4 | 2009 | 7  | 39.12% (38%-40.24%)    | 0.68% (0.49%-0.87%) | 32.35% (31.21%-33.48%) | 0.35% (0.21%-0.5%)  | 41.06% (39.84%-42.29%) | 0.63% (0.43%-0.82%) |
| 4 | 2009 | 6  | 39.68% (38.51%-40.85%) | 0.71% (0.51%-0.91%) | 32.27% (31.11%-33.44%) | 0.43% (0.27%-0.6%)  | 40.67% (39.42%-41.92%) | 0.69% (0.48%-0.9%)  |
| 4 | 2009 | 5  | 39.94% (38.78%-41.11%) | 0.81% (0.6%-1.02%)  | 32.43% (31.25%-33.61%) | 0.51% (0.33%-0.69%) | 42.13% (40.86%-43.39%) | 0.79% (0.56%-1.02%) |
| 4 | 2009 | 4  | 39.7% (38.53%-40.86%)  | 0.66% (0.47%-0.86%) | 33.25% (32.07%-34.43%) | 0.33% (0.18%-0.47%) | 44.11% (42.83%-45.39%) | 0.67% (0.46%-0.88%) |
| 4 | 2009 | 3  | 38.76% (37.67%-39.85%) | 0.56% (0.4%-0.73%)  | 34.26% (33.12%-35.4%)  | 0.38% (0.23%-0.52%) | 43.94% (42.72%-45.16%) | 0.63% (0.44%-0.82%) |
| 4 | 2009 | 2  | 40.11% (39%-41.23%)    | 0.73% (0.53%-0.92%) | 33.64% (32.51%-34.77%) | 0.51% (0.34%-0.68%) | 43.96% (42.75%-45.18%) | 0.75% (0.54%-0.96%) |
| 4 | 2009 | 1  | 38.74% (37.7%-39.78%)  | 0.73% (0.55%-0.91%) | 33.09% (32.01%-34.17%) | 0.58% (0.4%-0.75%)  | 42.55% (41.39%-43.71%) | 0.85% (0.63%-1.06%) |
| 4 | 2008 | 12 | 40.62% (39.61%-41.64%) | 0.64% (0.47%-0.8%)  | 32.92% (31.86%-33.97%) | 0.34% (0.21%-0.47%) | 42.4% (41.27%-43.53%)  | 0.64% (0.46%-0.82%) |
| 4 | 2008 | 11 | 39.81% (38.8%-40.82%)  | 0.72% (0.54%-0.89%) | 33.6% (32.54%-34.67%)  | 0.4% (0.26%-0.54%)  | 42.71% (41.56%-43.86%) | 0.61% (0.43%-0.8%)  |
| 4 | 2008 | 10 | 40.03% (38.99%-41.06%) | 0.67% (0.5%-0.84%)  | 32.82% (31.78%-33.86%) | 0.33% (0.2%-0.46%)  | 42.69% (41.57%-43.81%) | 0.65% (0.47%-0.84%) |
| 4 | 2008 | 9  | 39.77% (38.66%-40.88%) | 0.6% (0.43%-0.78%)  | 32.14% (31.01%-33.28%) | 0.43% (0.27%-0.59%) | 42.88% (41.65%-44.11%) | 0.72% (0.51%-0.93%) |
| 5 | 2008 | 8  | 49.19% (48.06%-50.32%) | 1.07% (0.83%-1.3%)  | 41.61% (40.42%-42.8%)  | 0.74% (0.54%-0.95%) | 50.65% (49.41%-51.88%) | 1.18% (0.91%-1.45%) |
| 5 | 2008 | 7  | 48.81% (47.67%-49.96%) | 1.1% (0.87%-1.34%)  | 42.78% (41.58%-43.98%) | 1.04% (0.79%-1.29%) | 51.37% (50.13%-52.61%) | 1.35% (1.07%-1.64%) |
| 5 | 2008 | 6  | 50.06% (48.89%-51.23%) | 0.97% (0.74%-1.2%)  | 44.36% (43.1%-45.62%)  | 1.05% (0.79%-1.31%) | 52.24% (50.95%-53.54%) | 1.34% (1.05%-1.64%) |
| 5 | 2008 | 5  | 51.58% (50.37%-52.8%)  | 1.29% (1.01%-1.56%) | 44.34% (43.08%-45.6%)  | 0.93% (0.69%-1.18%) | 52.86% (51.56%-54.15%) | 1.56% (1.23%-1.88%) |
| 5 | 2008 | 4  | 51.98% (50.75%-53.21%) | 0.84% (0.61%-1.07%) | 43.97% (42.71%-45.22%) | 0.93% (0.69%-1.17%) | 53.16% (51.88%-54.45%) | 1.59% (1.27%-1.92%) |
| 5 | 2008 | 3  | 51.79% (50.63%-52.95%) | 1.33% (1.07%-1.6%)  | 44.42% (43.24%-45.61%) | 0.83% (0.61%-1.04%) | 52.22% (51%-53.43%)    | 1.25% (0.98%-1.52%) |
| 5 | 2008 | 2  | 52.41% (51.27%-53.55%) | 1.29% (1.03%-1.54%) | 44.81% (43.61%-46.02%) | 0.94% (0.71%-1.18%) | 53.41% (52.18%-54.65%) | 1.23% (0.96%-1.5%)  |
| 5 | 2008 | 1  | 52.53% (51.47%-53.58%) | 1.05% (0.84%-1.27%) | 43.85% (42.72%-44.97%) | 0.86% (0.65%-1.07%) | 52.46% (51.3%-53.62%)  | 1.32% (1.05%-1.58%) |
| 5 | 2007 | 12 | 52.71% (51.66%-53.77%) | 1.12% (0.9%-1.35%)  | 45.3% (44.2%-46.39%)   | 0.82% (0.62%-1.01%) | 53.77% (52.64%-54.89%) | 1.37% (1.11%-1.63%) |
| 5 | 2007 | 11 | 52.08% (51.05%-53.11%) | 0.96% (0.76%-1.16%) | 44.73% (43.64%-45.82%) | 1% (0.78%-1.22%)    | 53.12% (52%-54.24%)    | 1.41% (1.15%-1.68%) |



|   |      |    |                            |                         |                            |                         |                            |                         |
|---|------|----|----------------------------|-------------------------|----------------------------|-------------------------|----------------------------|-------------------------|
| 5 | 2007 | 10 | 51.22% (50.14%-<br>52.31%) | 0.97% (0.76%-<br>1.18%) | 44.39% (43.28%-<br>45.5%)  | 0.88% (0.67%-<br>1.08%) | 52.83% (51.68%-<br>53.98%) | 1.4% (1.13%-<br>1.67%)  |
| 5 | 2007 | 9  | 50.71% (49.55%-<br>51.87%) | 1.42% (1.15%-<br>1.7%)  | 45.42% (44.21%-<br>46.63%) | 0.92% (0.69%-<br>1.15%) | 52.95% (51.71%-<br>54.19%) | 1.57% (1.26%-<br>1.88%) |
| 6 | 2007 | 8  | 57.78% (56.64%-<br>58.92%) | 2.17% (1.83%-<br>2.5%)  | 53.86% (52.66%-<br>55.05%) | 1.33% (1.05%-<br>1.6%)  | 60.63% (59.43%-<br>61.83%) | 2.25% (1.89%-<br>2.62%) |
| 6 | 2007 | 7  | 58.08% (56.93%-<br>59.22%) | 1.96% (1.64%-<br>2.28%) | 53.68% (52.47%-<br>54.89%) | 1.41% (1.12%-<br>1.69%) | 61.63% (60.42%-<br>62.83%) | 2.03% (1.68%-<br>2.38%) |
| 6 | 2007 | 6  | 60.38% (59.22%-<br>61.54%) | 2.22% (1.87%-<br>2.57%) | 54.01% (52.77%-<br>55.25%) | 1.57% (1.26%-<br>1.87%) | 61.84% (60.6%-<br>63.08%)  | 2.64% (2.23%-<br>3.05%) |
| 6 | 2007 | 5  | 59.13% (57.94%-<br>60.31%) | 1.97% (1.63%-<br>2.3%)  | 55.9% (54.62%-<br>57.18%)  | 1.54% (1.22%-<br>1.86%) | 63.6% (62.32%-<br>64.87%)  | 2.74% (2.31%-<br>3.18%) |
| 6 | 2007 | 4  | 60.61% (59.41%-<br>61.82%) | 2.49% (2.1%-<br>2.87%)  | 55.84% (54.54%-<br>57.14%) | 1.2% (0.91%-<br>1.48%)  | 62.37% (61.07%-<br>63.67%) | 2.32% (1.92%-<br>2.73%) |
| 6 | 2007 | 3  | 60.1% (58.97%-<br>61.23%)  | 2.29% (1.95%-<br>2.64%) | 56.98% (55.76%-<br>58.21%) | 1.71% (1.39%-<br>2.03%) | 63.8% (62.59%-<br>65.01%)  | 2.84% (2.42%-<br>3.26%) |
| 6 | 2007 | 2  | 61.4% (60.25%-<br>62.54%)  | 2.39% (2.03%-<br>2.75%) | 56.8% (55.6%-<br>58%)      | 1.58% (1.28%-<br>1.88%) | 63.1% (61.91%-<br>64.3%)   | 2.28% (1.91%-<br>2.65%) |
| 6 | 2007 | 1  | 60.9% (59.82%-<br>61.98%)  | 2.15% (1.83%-<br>2.47%) | 56.56% (55.45%-<br>57.68%) | 1.45% (1.18%-<br>1.72%) | 63.75% (62.64%-<br>64.86%) | 2.31% (1.96%-<br>2.65%) |
| 6 | 2006 | 12 | 61.56% (60.49%-<br>62.62%) | 2.3% (1.97%-<br>2.63%)  | 57.58% (56.47%-<br>58.69%) | 1.64% (1.35%-<br>1.92%) | 63.94% (62.84%-<br>65.04%) | 2.54% (2.18%-<br>2.9%)  |
| 6 | 2006 | 11 | 60.28% (59.2%-<br>61.37%)  | 2.2% (1.87%-<br>2.52%)  | 56.15% (55.07%-<br>57.24%) | 1.51% (1.24%-<br>1.78%) | 63.3% (62.22%-<br>64.38%)  | 2.37% (2.02%-<br>2.71%) |
| 6 | 2006 | 10 | 59.84% (58.75%-<br>60.94%) | 2.21% (1.89%-<br>2.54%) | 55.35% (54.21%-<br>56.5%)  | 1.53% (1.24%-<br>1.81%) | 61.98% (60.83%-<br>63.13%) | 2.51% (2.14%-<br>2.88%) |
| 6 | 2006 | 9  | 59.62% (58.41%-<br>60.82%) | 1.92% (1.58%-<br>2.25%) | 55.01% (53.79%-<br>56.24%) | 2.13% (1.77%-<br>2.48%) | 62.28% (61.06%-<br>63.5%)  | 2.99% (2.56%-<br>3.42%) |
| 7 | 2006 | 8  | 67.47% (66.35%-<br>68.59%) | 3.75% (3.3%-<br>4.2%)   | 61.84% (60.6%-<br>63.07%)  | 3.02% (2.58%-<br>3.45%) | 67.89% (66.67%-<br>69.11%) | 4.15% (3.63%-<br>4.67%) |
| 7 | 2006 | 7  | 68.91% (67.82%-<br>70.01%) | 3.81% (3.35%-<br>4.26%) | 62.11% (60.87%-<br>63.36%) | 2.84% (2.42%-<br>3.27%) | 68.71% (67.5%-<br>69.92%)  | 3.96% (3.45%-<br>4.47%) |
| 7 | 2006 | 6  | 70.11% (69%-<br>71.22%)    | 4.14% (3.66%-<br>4.62%) | 63.73% (62.46%-<br>64.99%) | 2.92% (2.48%-<br>3.36%) | 70% (68.77%-<br>71.23%)    | 4.33% (3.78%-<br>4.87%) |
| 7 | 2006 | 5  | 69.41% (68.28%-<br>70.54%) | 3.91% (3.43%-<br>4.38%) | 62.97% (61.68%-<br>64.25%) | 2.92% (2.47%-<br>3.36%) | 68.84% (67.57%-<br>70.1%)  | 4.42% (3.86%-<br>4.98%) |
| 7 | 2006 | 4  | 69.39% (68.26%-<br>70.52%) | 4.33% (3.83%-<br>4.83%) | 64.91% (63.62%-<br>66.2%)  | 3.26% (2.78%-<br>3.74%) | 70.38% (69.12%-<br>71.64%) | 4.17% (3.62%-<br>4.72%) |
| 7 | 2006 | 3  | 70.09% (69.04%-<br>71.14%) | 4.33% (3.86%-<br>4.8%)  | 64.41% (63.19%-<br>65.63%) | 3.21% (2.76%-<br>3.66%) | 69.74% (68.54%-<br>70.93%) | 4.56% (4.02%-<br>5.1%)  |
| 7 | 2006 | 2  | 71.27% (70.2%-<br>72.35%)  | 4.32% (3.84%-<br>4.8%)  | 65.2% (63.96%-<br>66.45%)  | 3.04% (2.59%-<br>3.49%) | 71.06% (69.85%-<br>72.27%) | 4.12% (3.58%-<br>4.65%) |
| 7 | 2006 | 1  | 70.28% (69.24%-<br>71.32%) | 4.09% (3.64%-<br>4.54%) | 64.59% (63.43%-<br>65.76%) | 2.82% (2.42%-<br>3.22%) | 70.51% (69.38%-<br>71.64%) | 4.09% (3.6%-<br>4.58%)  |

|   |      |    |                        |                     |                        |                     |                        |                     |
|---|------|----|------------------------|---------------------|------------------------|---------------------|------------------------|---------------------|
| 7 | 2005 | 12 | 70.25% (69.22%-71.28%) | 3.69% (3.27%-4.11%) | 66.09% (64.95%-67.23%) | 2.85% (2.45%-3.25%) | 71.04% (69.93%-72.16%) | 4.11% (3.62%-4.6%)  |
| 7 | 2005 | 11 | 69.65% (68.6%-70.7%)   | 3.93% (3.49%-4.37%) | 63.45% (62.27%-64.62%) | 2.86% (2.45%-3.26%) | 68.72% (67.57%-69.88%) | 3.82% (3.34%-4.29%) |
| 7 | 2005 | 10 | 70.69% (69.62%-71.76%) | 3.74% (3.3%-4.19%)  | 64.12% (62.95%-65.3%)  | 3% (2.58%-3.42%)    | 68.62% (67.46%-69.78%) | 4.11% (3.61%-4.6%)  |
| 7 | 2005 | 9  | 69.47% (68.27%-70.66%) | 4.77% (4.21%-5.32%) | 64.31% (63.01%-65.61%) | 2.78% (2.33%-3.23%) | 69.37% (68.08%-70.65%) | 3.67% (3.14%-4.19%) |
| 8 | 2005 | 8  | 73.08% (72%-74.16%)    | 6.04% (5.46%-6.61%) | 70.15% (69.01%-71.3%)  | 4.31% (3.8%-4.81%)  | 74.28% (73.16%-75.41%) | 5.99% (5.38%-6.6%)  |
| 8 | 2005 | 7  | 73.73% (72.64%-74.81%) | 6.38% (5.78%-6.99%) | 70.63% (69.5%-71.76%)  | 4.7% (4.17%-5.23%)  | 74.26% (73.15%-75.38%) | 6.1% (5.49%-6.71%)  |
| 8 | 2005 | 6  | 74.07% (72.97%-75.16%) | 6.05% (5.46%-6.65%) | 71.82% (70.67%-72.96%) | 4.91% (4.36%-5.46%) | 75.31% (74.18%-76.43%) | 6.09% (5.47%-6.72%) |
| 8 | 2005 | 5  | 73.92% (72.8%-75.04%)  | 6.29% (5.67%-6.91%) | 71.84% (70.69%-73%)    | 5.09% (4.52%-5.65%) | 75.67% (74.54%-76.8%)  | 5.86% (5.24%-6.48%) |
| 8 | 2005 | 4  | 75.86% (74.79%-76.94%) | 5.99% (5.39%-6.58%) | 71.99% (70.84%-73.15%) | 5.26% (4.68%-5.83%) | 76.03% (74.9%-77.16%)  | 6.52% (5.87%-7.18%) |
| 8 | 2005 | 3  | 74.94% (73.92%-75.97%) | 6.02% (5.45%-6.58%) | 72.63% (71.55%-73.71%) | 5.39% (4.84%-5.93%) | 76.51% (75.46%-77.56%) | 6.7% (6.08%-7.32%)  |
| 8 | 2005 | 2  | 74.32% (73.26%-75.38%) | 6% (5.42%-6.58%)    | 74.01% (72.92%-75.11%) | 5.28% (4.72%-5.84%) | 77.02% (75.94%-78.1%)  | 6.3% (5.67%-6.92%)  |
| 8 | 2005 | 1  | 75.05% (74.07%-76.03%) | 5.69% (5.17%-6.22%) | 72.54% (71.47%-73.61%) | 5.17% (4.64%-5.7%)  | 75.88% (74.83%-76.93%) | 6.57% (5.96%-7.18%) |
| 8 | 2004 | 12 | 74.74% (73.77%-75.72%) | 5.88% (5.35%-6.41%) | 72.36% (71.3%-73.42%)  | 4.65% (4.15%-5.15%) | 75.01% (73.95%-76.06%) | 5.92% (5.35%-6.5%)  |
| 8 | 2004 | 11 | 74.4% (73.41%-75.4%)   | 5.93% (5.39%-6.47%) | 72.09% (71.01%-73.16%) | 4.61% (4.1%-5.11%)  | 75.51% (74.45%-76.57%) | 5.69% (5.12%-6.26%) |
| 8 | 2004 | 10 | 73.5% (72.45%-74.56%)  | 5.92% (5.36%-6.49%) | 73.17% (72.07%-74.27%) | 4.66% (4.14%-5.18%) | 76.86% (75.79%-77.94%) | 6% (5.4%-6.61%)     |
| 8 | 2004 | 9  | 71.85% (70.51%-73.19%) | 5.27% (4.61%-5.94%) | 72.57% (71.36%-73.79%) | 5.58% (4.96%-6.21%) | 75.27% (74.07%-76.48%) | 7.22% (6.49%-7.94%) |
| 9 | 2004 | 8  | 76.96% (75.9%-78.02%)  | 6.9% (6.26%-7.53%)  | 75.35% (74.24%-76.46%) | 7.05% (6.39%-7.71%) | 77.82% (76.71%-78.94%) | 8.16% (7.43%-8.89%) |
| 9 | 2004 | 7  | 76.17% (75.08%-77.26%) | 7.06% (6.4%-7.72%)  | 75.2% (74.07%-76.33%)  | 7.25% (6.57%-7.93%) | 77.56% (76.42%-78.7%)  | 8.41% (7.65%-9.17%) |
| 9 | 2004 | 6  | 76.64% (75.52%-77.75%) | 7.85% (7.14%-8.56%) | 75.77% (74.64%-76.91%) | 7.14% (6.46%-7.83%) | 78.16% (77.02%-79.3%)  | 8.03% (7.28%-8.78%) |
| 9 | 2004 | 5  | 77.27% (76.15%-78.38%) | 7.94% (7.22%-8.66%) | 76.25% (75.1%-77.4%)   | 7.42% (6.71%-8.13%) | 77.82% (76.65%-78.98%) | 8.45% (7.67%-9.23%) |
| 9 | 2004 | 4  | 77.74% (76.64%-78.85%) | 9.05% (8.28%-9.81%) | 77.8% (76.7%-78.9%)    | 7.3% (6.61%-7.99%)  | 80.12% (79.01%-81.23%) | 8.66% (7.88%-9.44%) |
| 9 | 2004 | 3  | 78.6% (77.58%-79.63%)  | 8.45% (7.76%-9.15%) | 77.27% (76.22%-78.32%) | 7.43% (6.77%-8.09%) | 78.7% (77.63%-79.77%)  | 8.8% (8.05%-9.54%)  |

|    |      |    |                        |                        |                        |                        |                        |                        |
|----|------|----|------------------------|------------------------|------------------------|------------------------|------------------------|------------------------|
| 9  | 2004 | 2  | 77.13% (76.07%-78.19%) | 7.63% (6.97%-8.3%)     | 76.56% (75.46%-77.65%) | 7.27% (6.6%-7.95%)     | 78.64% (77.53%-79.75%) | 8.45% (7.7%-9.2%)      |
| 9  | 2004 | 1  | 77.58% (76.52%-78.64%) | 7.52% (6.85%-8.19%)    | 77.67% (76.67%-78.68%) | 6.53% (5.93%-7.12%)    | 79.03% (78.01%-80.06%) | 7.91% (7.23%-8.59%)    |
| 9  | 2003 | 12 | 76.55% (75.44%-77.66%) | 7.95% (7.24%-8.65%)    | 76.37% (75.36%-77.38%) | 6.9% (6.3%-7.5%)       | 78.66% (77.64%-79.67%) | 8.21% (7.53%-8.89%)    |
| 9  | 2003 | 11 | 75.64% (74.47%-76.81%) | 6.75% (6.07%-7.44%)    | 76.75% (75.73%-77.77%) | 7.29% (6.66%-7.92%)    | 78.57% (77.53%-79.6%)  | 8.08% (7.39%-8.77%)    |
| 9  | 2003 | 10 | 76.45% (75.2%-77.69%)  | 6.83% (6.09%-7.57%)    | 75.28% (74.18%-76.37%) | 6.67% (6.03%-7.3%)     | 77.79% (76.69%-78.89%) | 8.27% (7.54%-9%)       |
| 9  | 2003 | 9  | 76.18% (74.59%-77.77%) | 6.57% (5.65%-7.5%)     | 75.12% (73.75%-76.48%) | 6.75% (5.96%-7.55%)    | 76.75% (75.36%-78.13%) | 7.66% (6.78%-8.53%)    |
| 10 | 2003 | 8  | 79.25% (78.06%-80.44%) | 9.38% (8.52%-10.23%)   | 79.44% (78.27%-80.61%) | 8.68% (7.87%-9.49%)    | 80.92% (79.75%-82.09%) | 9.91% (9.02%-10.8%)    |
| 10 | 2003 | 7  | 79.69% (78.5%-80.87%)  | 10.58% (9.68%-11.49%)  | 79.98% (78.8%-81.16%)  | 9.37% (8.51%-10.23%)   | 80.46% (79.26%-81.66%) | 10.44% (9.51%-11.36%)  |
| 10 | 2003 | 6  | 79.53% (78.32%-80.75%) | 9.84% (8.95%-10.74%)   | 79.5% (78.28%-80.73%)  | 9.94% (9.03%-10.84%)   | 80.91% (79.68%-82.14%) | 11.45% (10.46%-12.45%) |
| 10 | 2003 | 5  | 80.43% (79.22%-81.64%) | 10.87% (9.92%-11.82%)  | 80.21% (78.99%-81.42%) | 10.15% (9.23%-11.07%)  | 80.2% (78.96%-81.45%)  | 11% (10.02%-11.98%)    |
| 10 | 2003 | 4  | 80.33% (79.14%-81.53%) | 10.73% (9.8%-11.65%)   | 80.46% (79.25%-81.66%) | 10.61% (9.68%-11.55%)  | 81.32% (80.1%-82.53%)  | 11.74% (10.74%-12.75%) |
| 10 | 2003 | 3  | 80.26% (79.13%-81.39%) | 10.36% (9.5%-11.23%)   | 81.41% (80.29%-82.53%) | 10.42% (9.54%-11.3%)   | 82.25% (81.12%-83.38%) | 11.51% (10.56%-12.45%) |
| 10 | 2003 | 2  | 80.07% (78.9%-81.24%)  | 10.05% (9.17%-10.93%)  | 79.19% (78.02%-80.36%) | 8.84% (8.03%-9.66%)    | 80.12% (78.93%-81.31%) | 9.85% (8.96%-10.74%)   |
| 10 | 2003 | 1  | 80.17% (79.04%-81.29%) | 9.82% (8.99%-10.66%)   | 79.38% (78.2%-80.57%)  | 9.39% (8.54%-10.25%)   | 80.48% (79.29%-81.67%) | 10.05% (9.15%-10.96%)  |
| 10 | 2002 | 12 | 79.21% (78.06%-80.37%) | 9.19% (8.36%-10.01%)   | 80.13% (78.93%-81.33%) | 9.42% (8.54%-10.3%)    | 81.13% (79.91%-82.34%) | 10.42% (9.47%-11.37%)  |
| 10 | 2002 | 11 | 78.73% (77.52%-79.94%) | 8.84% (8%-9.67%)       | 78.08% (76.78%-79.37%) | 8.65% (7.77%-9.53%)    | 80.12% (78.83%-81.41%) | 9.68% (8.73%-10.64%)   |
| 10 | 2002 | 10 | 78.94% (77.61%-80.27%) | 9.23% (8.29%-10.18%)   | 79.75% (78.39%-81.1%)  | 9.08% (8.11%-10.05%)   | 80.49% (79.12%-81.87%) | 9.86% (8.83%-10.9%)    |
| 10 | 2002 | 9  | 75.85% (74.06%-77.63%) | 8.08% (6.95%-9.22%)    | 79.44% (77.72%-81.16%) | 8.27% (7.1%-9.44%)     | 79.28% (77.5%-81.07%)  | 9.53% (8.23%-10.82%)   |
| 11 | 2002 | 8  | 81.42% (80.27%-82.57%) | 10.72% (9.8%-11.63%)   | 80.12% (78.87%-81.36%) | 10.88% (9.91%-11.85%)  | 80.23% (78.95%-81.51%) | 11.56% (10.53%-12.59%) |
| 11 | 2002 | 7  | 82.13% (80.99%-83.28%) | 12.57% (11.58%-13.56%) | 81.16% (79.94%-82.38%) | 11.53% (10.53%-12.53%) | 82.26% (81.02%-83.49%) | 13.15% (12.06%-14.24%) |

|    |      |    |                        |                        |                        |                        |                        |                        |
|----|------|----|------------------------|------------------------|------------------------|------------------------|------------------------|------------------------|
|    |      |    |                        |                        |                        |                        | 12.53%)                | 14.24%)                |
| 11 | 2002 | 6  | 80.61% (79.39%-81.83%) | 11.63% (10.64%-12.62%) | 79.98% (78.7%-81.26%)  | 11.2% (10.19%-12.21%)  | 80.97% (79.67%-82.26%) | 12.33% (11.24%-13.42%) |
| 11 | 2002 | 5  | 81.79% (80.6%-82.98%)  | 12.12% (11.12%-13.13%) | 81% (79.74%-82.27%)    | 12.18% (11.12%-13.23%) | 82.05% (80.77%-83.32%) | 12.95% (11.83%-14.06%) |
| 11 | 2002 | 4  | 83.16% (82.01%-84.31%) | 12.25% (11.24%-13.26%) | 81.08% (79.83%-82.33%) | 12.47% (11.42%-13.52%) | 81.82% (80.55%-83.1%)  | 13.09% (11.98%-14.21%) |
| 11 | 2002 | 3  | 82.33% (81.21%-83.44%) | 11.96% (11.01%-12.91%) | 80.9% (79.72%-82.09%)  | 11.42% (10.46%-12.37%) | 81.71% (80.51%-82.91%) | 13.09% (12.04%-14.13%) |
| 11 | 2002 | 2  | 82.43% (81.28%-83.57%) | 11.49% (10.53%-12.45%) | 80.77% (79.54%-82%)    | 11.35% (10.36%-12.34%) | 81.25% (79.99%-82.5%)  | 11.81% (10.77%-12.85%) |
| 11 | 2002 | 1  | 82.48% (81.34%-83.62%) | 11.56% (10.61%-12.52%) | 81.66% (80.49%-82.83%) | 11.54% (10.58%-12.5%)  | 83.02% (81.85%-84.19%) | 12.3% (11.27%-13.32%)  |
| 11 | 2001 | 12 | 80.76% (79.55%-81.97%) | 11.59% (10.61%-12.58%) | 79.72% (78.51%-80.94%) | 10.62% (9.68%-11.55%)  | 80.56% (79.32%-81.79%) | 12.2% (11.18%-13.22%)  |
| 11 | 2001 | 11 | 81.71% (80.47%-82.96%) | 11.26% (10.24%-12.28%) | 79.78% (78.52%-81.03%) | 9.97% (9.03%-10.91%)   | 80.97% (79.7%-82.24%)  | 10.76% (9.76%-11.77%)  |
| 11 | 2001 | 10 | 79.52% (78.15%-80.89%) | 10.33% (9.3%-11.37%)   | 80.09% (78.71%-81.47%) | 10.1% (9.06%-11.14%)   | 81.27% (79.88%-82.66%) | 11.28% (10.15%-12.41%) |
| 11 | 2001 | 9  | 82.04% (80.36%-83.72%) | 10.47% (9.13%-11.81%)  | 77.73% (75.9%-79.55%)  | 9.91% (8.6%-11.22%)    | 78.67% (76.82%-80.52%) | 10.59% (9.19%-11.98%)  |
| 12 | 2001 | 8  | 82.74% (81.47%-84.01%) | 13.08% (11.95%-14.21%) | 84.28% (83.02%-85.54%) | 12.98% (11.82%-14.14%) | 85.29% (83.99%-86.59%) | 13.98% (12.71%-15.25%) |
| 12 | 2001 | 7  | 83.41% (82.15%-84.68%) | 12.45% (11.32%-13.57%) | 85.88% (84.68%-87.09%) | 14.8% (13.57%-16.04%)  | 86.57% (85.32%-87.82%) | 16.22% (14.87%-17.57%) |
| 12 | 2001 | 6  | 81.15% (79.81%-82.49%) | 13.8% (12.62%-14.98%)  | 84.01% (82.69%-85.32%) | 14.65% (13.38%-15.92%) | 85.54% (84.19%-86.89%) | 15.68% (14.29%-17.08%) |
| 12 | 2001 | 5  | 82.53% (81.24%-83.83%) | 13.35% (12.19%-14.51%) | 84.98% (83.71%-86.25%) | 14.5% (13.25%-15.75%)  | 85.36% (84.03%-86.69%) | 15.71% (14.34%-17.08%) |
| 12 | 2001 | 4  | 82.42% (81.13%-83.72%) | 12.27% (11.15%-13.39%) | 85.47% (84.21%-86.72%) | 14.53% (13.28%-15.79%) | 87.25% (85.99%-88.52%) | 16.01% (14.62%-17.4%)  |
| 12 | 2001 | 3  | 82.49% (81.23%-83.74%) | 13.31% (12.19%-14.44%) | 85.45% (84.25%-86.65%) | 14.1% (12.92%-15.28%)  | 86.81% (85.59%-88.03%) | 15.02% (13.73%-        |

|    |      |   |                        |                        |                        |                        |                        |                       |
|----|------|---|------------------------|------------------------|------------------------|------------------------|------------------------|-----------------------|
|    |      |   |                        |                        |                        |                        |                        | 16.31%)               |
| 12 | 2001 | 2 | 82.76% (81.49%-84.03%) | 11.75% (10.67%-12.83%) | 83.68% (82.39%-84.96%) | 14.77% (13.54%-16.01%) | 85.7% (84.4%-87%)      | 15.23% (13.9%-16.56%) |
| 12 | 2001 | 1 | 82.51% (81.31%-83.7%)  | 13.1% (12.03%-14.16%)  | 86.01% (84.8%-87.21%)  | 13.9% (12.69%-15.1%)   | 85.93% (84.65%-87.21%) | 14.88% (13.57%-16.2%) |

**Supplemental Table S7. The influence of COVID-19 on myopia progression among school-aged children**

| Characteristics             | Normal (6-month interval) |                                 | COVID-19 (6-month interval) |                                  | P value |
|-----------------------------|---------------------------|---------------------------------|-----------------------------|----------------------------------|---------|
|                             | Count                     | Mean myopia progression(95% CI) | Count                       | Mean myopia progression (95% CI) |         |
| <b>Total</b>                | 547,475                   | -0.263 (-0.262, -0.264)         | 575,597                     | -0.390 (-0.389, -0.391)          | < 0.001 |
| <b>Gender</b>               |                           |                                 |                             |                                  |         |
| Male                        | 299,857                   | -0.266 (-0.264, -0.268)         | 314,432                     | -0.385(-0.383, -0.387)           | < 0.001 |
| Female                      | 247,618                   | -0.259 (-0.257, -0.261)         | 261,165                     | -0.396(-0.394, -0.398)           | < 0.001 |
| <b>Educational level</b>    |                           |                                 |                             |                                  |         |
| Grade group I               | 325,756                   | -0.259 (-0.258, -0.261)         | 349,152                     | -0.442 (-0.440, -0.443)          | < 0.001 |
| Grade group II              | 151,446                   | -0.277 (-0.274, -0.280)         | 155,708                     | -0.327 (-0.324, -0.329)          | < 0.001 |
| <b>Educational system</b>   |                           |                                 |                             |                                  |         |
| Non-Key school              | 106,107                   | -0.263 (-0.261, -0.264)         | 118,971                     | -0.395 (-0.394, -0.397)          | < 0.001 |
| Key school                  | 441,368                   | -0.264 (-0.261, -0.267)         | 456,626                     | -0.369 (-0.366, -0.372)          | < 0.001 |
| <b>Region of habitation</b> |                           |                                 |                             |                                  |         |
| Rural                       | 426,584                   | -0.255 (-0.252, -0.258)         | 444,595                     | -0.392 (-0.389, -0.396)          | < 0.001 |
| Urban                       | 90,632                    | -0.263 (-0.262, -0.265)         | 89,517                      | -0.388 (-0.387, -0.390)          | < 0.001 |

**Supplemental Table S8. The impact of COVID-19 on myopia progression among school-aged children categorized by grade**

| Grade group           | Characteristics    | Grade | Normal (6-month interval) |                                  | COVID-19 (6-month interval) |                                  | P value |
|-----------------------|--------------------|-------|---------------------------|----------------------------------|-----------------------------|----------------------------------|---------|
|                       |                    |       | Count                     | Mean myopia progression (95% CI) | Count                       | Mean myopia progression (95% CI) |         |
| <b>Grade Group I</b>  | Elementary School  | 1     | 54,648                    | -0.225 (-0.222, -0.229)          | 60,977                      | -0.418 (-0.414, -0.422)          | < 0.001 |
|                       |                    | 2     | 53,537                    | -0.224 (-0.221, -0.228)          | 58,965                      | -0.441(-0.437, -0.445)           | < 0.001 |
|                       |                    | 3     | 53,996                    | -0.240 (-0.236, -0.244)          | 57,941                      | -0.463(-0.459, -0.467)           | < 0.001 |
|                       |                    | 4     | 55,713                    | -0.263 (-0.260, -0.267)          | 59,030                      | -0.461(-0.457, -0.465)           | < 0.001 |
|                       |                    | 5     | 56,615                    | -0.293 (-0.289, -0.297)          | 58,917                      | -0.464(-0.460, -0.469)           | < 0.001 |
|                       |                    | 6     | 51,247                    | -0.311 (-0.306, -0.316)          | 53,322                      | -0.40 (-0.396, -0.404)           | < 0.001 |
| <b>Grade Group II</b> | Junior high school | 7     | 57,311                    | -0.272 (-0.268, -0.275)          | 58,656                      | -0.352 (-0.348, -0.356)          | < 0.001 |
|                       |                    | 8     | 54,135                    | -0.268 (-0.264, -0.272)          | 54,587                      | -0.323 (-0.319, -0.327)          | < 0.001 |
|                       |                    | 9     | 40,000                    | -0.297 (-0.290, -0.303)          | 42,465                      | -0.297 (-0.292, -0.302)          | 0.96    |
|                       |                    | 10    | 39,773                    | -0.240 (-0.235, -0.245)          | 40,322                      | -0.268(-0.263, -0.273)           | < 0.001 |
|                       |                    | 11    | 30,500                    | -0.260 (-0.254, -0.267)          | 30,415                      | -0.281 (-0.275, -0.287)          | < 0.001 |

**Supplemental Table S9. The impact of COVID-19 on incidence of myopia among school-aged children categorized by grade**

| Characteristics    | Grade | Normal (6-month interval) |                         | COVID-19 (6-month interval) |                         | Odds Ratio (95% CI) | P value |
|--------------------|-------|---------------------------|-------------------------|-----------------------------|-------------------------|---------------------|---------|
|                    |       | Count                     | Incidence rate (95% CI) | Count                       | Incidence rate (95% CI) |                     |         |
| Elementary School  | 1     | 52,049                    | 4.66% (4.48%-4.84%)     | 49,622                      | 7.64% (7.40%-7.87%)     | 1.69 (1.60-1.78)    | < 0.001 |
|                    | 2     | 43,438                    | 6.21% (5.98%-6.43%)     | 40,742                      | 9.85% (9.56%-10.13%)    | 1.65 (1.57-1.74)    | < 0.001 |
|                    | 3     | 34,587                    | 8.54% (8.25%-8.84%)     | 31,632                      | 12.05% (11.69%-12.41%)  | 1.47 (1.39-1.54)    | < 0.001 |
|                    | 4     | 27,220                    | 9.89% (9.54%-10.24%)    | 24,528                      | 12.34% (11.93%-12.75%)  | 1.28 (1.21-1.36)    | < 0.001 |
|                    | 5     | 19,798                    | 11.88% (11.43%-12.33%)  | 17,446                      | 13.66% (13.15%-14.17%)  | 1.17 (1.10-1.25)    | < 0.001 |
|                    | 6     | 13,541                    | 13.82% (13.24%-14.41%)  | 11,669                      | 11.10% (10.53%-11.67%)  | 0.78 (0.72-0.84)    | < 0.001 |
| Junior high school | 7     | 10,371                    | 12.15% (11.52%-12.78%)  | 9,111                       | 8.34% (7.77%-8.91%)     | 0.66 (0.60-0.72)    | < 0.001 |
|                    | 8     | 7,880                     | 12.09% (11.37%-12.81%)  | 6,927                       | 7.10% (6.50%-7.71%)     | 0.56 (0.50-0.62)    | < 0.001 |
|                    | 9     | 4,813                     | 16.77% (15.71%-17.82%)  | 4,006                       | 3.52% (2.95%-4.09%)     | 0.18 (0.15-0.22)    | < 0.001 |
| Senior high school | 10    | 4,410                     | 9.95% (9.07%-10.84%)    | 3,971                       | 3.05% (2.51%-3.58%)     | 0.28 (0.23-0.35)    | < 0.001 |
|                    | 11    | 2,297                     | 12.7% (11.35%-14.08%)   | 2,005                       | 3.84% (3.00%-4.68%)     | 0.27 (0.21-0.36)    | < 0.001 |

**Supplemental Table S10. The impact of COVID-19 on incidence of high myopia among school-aged children categorized by grade**

| Characteristics   | Grade | Normal (6-month interval) |                         | COVID-19 (6-month interval) |                         | Odds Ratio (95% CI) | P value |
|-------------------|-------|---------------------------|-------------------------|-----------------------------|-------------------------|---------------------|---------|
|                   |       | Count                     | Incidence rate (95% CI) | Count                       | Incidence rate (95% CI) |                     |         |
| Elementary School | 1     | 58,658                    | 0.063% (0.043%-0.083%)  | 58,621                      | 0.061% (0.041%-0.081%)  | 0.97 (0.60-1.58)    | 1.0     |
|                   | 2     | 55,552                    | 0.11% (0.084%-0.14%)    | 55,490                      | 0.16% (0.13%-0.19%)     | 1.44 (1.03-2.02)    | 0.028   |
|                   | 3     | 54,341                    | 0.23% (0.19%-0.27%)     | 54,214                      | 0.39% (0.33%-0.44%)     | 1.65 (1.32-2.08)    | < 0.001 |
|                   | 4     | 55,753                    | 0.45% (0.39%-0.51%)     | 55,501                      | 0.63% (0.57%-0.70%)     | 1.41 (1.91-1.66)    | < 0.001 |

|                    |    |        |                     |        |                     |                  |         |
|--------------------|----|--------|---------------------|--------|---------------------|------------------|---------|
| Junior high school | 5  | 56,440 | 0.77% (0.69%-0.84%) | 56,008 | 1.17% (1.08%-1.26%) | 1.54 (1.36-1.74) | < 0.001 |
|                    | 6  | 51,554 | 1.32% (1.22%-1.42%) | 50,873 | 1.41% (1.31%-1.51%) | 1.07 (0.96-1.19) | 0.22    |
|                    | 7  | 56,667 | 1.64% (1.54%-1.75%) | 55,736 | 1.59% (1.48%-1.69%) | 0.97 (0.88-1.06) | 0.48    |
|                    | 8  | 52,790 | 2.19% (2.07%-2.32%) | 51,632 | 1.61% (1.51%-1.72%) | 0.73 (0.67-0.80) | < 0.001 |
|                    | 9  | 40,745 | 3.13% (2.96%-3.30%) | 39,469 | 1.48% (1.36%-1.59%) | 0.46 (0.42-0.51) | < 0.001 |
| Senior high school | 10 | 38,117 | 2.97% (2.80%-3.14%) | 36,985 | 1.38% (1.26%-1.50%) | 0.46 (0.41-0.51) | < 0.001 |
|                    | 11 | 28,605 | 3.87% (3.65%-4.09%) | 27,498 | 1.13% (1.01%-1.26%) | 0.28 (0.25-0.32) | < 0.001 |

## References:

1. You QS, Wu LJ, Duan JL, et al. Prevalence of myopia in school children in greater Beijing: the Beijing Childhood Eye Study. *Acta ophthalmologica* 2014; **92**(5): e398-e406.
2. You QS, Wu LJ, Duan JL, et al. Factors associated with myopia in school children in China: the Beijing childhood eye study. *PloS one* 2012; **7**(12): e52668.
3. Wu LJ, You QS, Duan JL, et al. Prevalence and associated factors of myopia in high-school students in Beijing. *PLoS One* 2015; **10**(3): e0120764.
4. Zhao J, Pan X, Sui R, Munoz SR, Sperduto RD, Ellwein LB. Refractive error study in children: results from Shunyi District, China. *American journal of ophthalmology* 2000; **129**(4): 427-35.
5. Lyu Y, Zhang H, Gong Y, et al. Prevalence of and factors associated with myopia in primary school students in the Chaoyang District of Beijing, China. *Japanese journal of ophthalmology* 2015; **59**(6): 421-9.
6. Ye S, Liu S, Li W, Wang Q, Xi W, Zhang X. Associations between anthropometric indicators and both refraction and ocular biometrics in a cross-sectional study of Chinese schoolchildren. *BMJ open* 2019; **9**(5): e027212.
7. He M, Huang W, Zheng Y, Huang L, Ellwein LB. Refractive error and visual impairment in school children in rural southern China. *Ophthalmology* 2007; **114**(2): 374-82. e1.
8. He M, Zeng J, Liu Y, Xu J, Pokharel GP, Ellwein LB. Refractive error and visual impairment in urban children in southern China. *Investigative ophthalmology & visual science* 2004; **45**(3): 793-9.
9. Guo K, Yang DY, Wang Y, et al. Prevalence of myopia in schoolchildren in Ejina: the Gobi Desert children eye study. *Investigative ophthalmology & visual science* 2015; **56**(3): 1769-74.
10. Wu JF, Bi HS, Wang SM, et al. Refractive error, visual acuity and causes of vision loss in children in Shandong, China. The Shandong Children Eye Study. *PLoS One* 2013; **8**(12): e82763.
11. Li Z, Xu K, Wu S, et al. Population - based survey of refractive error among school - aged children in rural northern China: the Heilongjiang eye study. *Clinical & experimental ophthalmology* 2014; **42**(4): 379-84.
12. Pi L-H, Chen L, Liu Q, et al. Refractive status and prevalence of refractive errors in suburban school-age children. *International journal of medical sciences* 2010; **7**(6): 342.
13. MORGAN A, YOUNG R, NARANKHAND B, CHEN S, COTTRIAL C, HOSKING S. Prevalence rate of myopia in schoolchildren in rural Mongolia. *Optometry and vision science* 2006; **83**(1): 53-6.
14. Congdon N, Wang Y, Song Y, et al. Visual disability, visual function, and myopia among rural Chinese secondary school children: the Xichang Pediatric Refractive Error Study (X-PRES)—report 1. *Investigative ophthalmology & visual science*

2008; **49**(7): 2888-94.

15. Fan DS, Lam DS, Lam RF, et al. Prevalence, incidence, and progression of myopia of school children in Hong Kong. *Investigative ophthalmology & visual science* 2004; **45**(4): 1071-5.
16. Lam CSY, Lam CH, Cheng SCK, Chan LYL. Prevalence of myopia among Hong Kong Chinese schoolchildren: changes over two decades. *Ophthalmic and Physiological Optics* 2012; **32**(1): 17-24.
17. Lam CSY, Goldschmidt E, Edwards MH. Prevalence of myopia in local and international schools in Hong Kong. *Optometry and vision science* 2004; **81**(5): 317-22.
18. LL L, YF S, CK H, CJ C, LA L, PT H. Epidemiologic study of the prevalence and severity of myopia among schoolchildren in Taiwan in 2000. *Journal of the Formosan Medical Association = Taiwan yi zhi* 2001; **100**(10): 684-91.
19. Lin LL-K, Shih Y-F, Hsiao CK, Chen C. Prevalence of myopia in Taiwanese schoolchildren: 1983 to 2000. *Annals Academy of Medicine Singapore* 2004; **33**(1): 27-33.
20. Lai Y-H, Hsu H-T, Wang H-Z, Chang S-J, Wu W-C. The visual status of children ages 3 to 6 years in the vision screening program in Taiwan. *Journal of American Association for Pediatric Ophthalmology and Strabismus* 2009; **13**(1): 58-62.
21. Guo Y, Lin H, Lin L, Cheng C. Self-reported myopia in Taiwan: 2005 Taiwan national health interview survey. *Eye* 2012; **26**(5): 684.
22. Lee JH, Jee D, Kwon J-W, Lee WK. Prevalence and risk factors for myopia in a rural Korean population. *Investigative ophthalmology & visual science* 2013; **54**(8): 5466-71.
23. Rim TH, Kim S-H, Lim KH, Choi M, Kim HY, Baek S-H. Refractive errors in Koreans: the Korea national health and nutrition examination survey 2008-2012. *Korean Journal of Ophthalmology* 2016; **30**(3): 214-24.
24. Lim HT, Yoon JS, Hwang S-S, Lee SY. Prevalence and associated sociodemographic factors of myopia in Korean children: the 2005 third Korea National Health and Nutrition Examination Survey (KNHANES III). *Japanese journal of ophthalmology* 2012; **56**(1): 76-81.
25. Jung S-K, Lee JH, Kakizaki H, Jee D. Prevalence of myopia and its association with body stature and educational level in 19-year-old male conscripts in Seoul, South Korea. *Investigative ophthalmology & visual science* 2012; **53**(9): 5579-83.
26. Quek TP, Chua CG, Chong CS, et al. Prevalence of refractive errors in teenage high school students in Singapore. *Ophthalmic and Physiological Optics* 2004; **24**(1): 47-55.
27. Saw S-M, Carkeet A, Chia K-S, Stone RA, Tan DT. Component dependent risk factors for ocular parameters in Singapore Chinese children. *Ophthalmology* 2002; **109**(11): 2065-71.
28. Rose KA, Morgan IG, Smith W, Burlutsky G, Mitchell P, Saw S-M. Myopia, lifestyle, and schooling in students of Chinese ethnicity in Singapore and Sydney. *Archives of ophthalmology* 2008; **126**(4): 527-30.
29. Matsumura H, Hirai H. Prevalence of myopia and refractive changes in students from 3 to 17 years of age. *Survey of ophthalmology* 1999; **44**: S109-S15.
30. Yotsukura E, Torii H, Inokuchi M, et al. Current Prevalence of Myopia and Association of Myopia With Environmental Factors Among Schoolchildren in Japan. *JAMA ophthalmology* 2019.
